# Supplementary material for: Early Development and School Readiness from the Perspective of Addressing Barriers to Learning. A Center Brief.
Source: MDPI journal article supplement (doi:10.3390/ma15155435), 2001-11-01
Supplement: s1 [file s1]

# Application of machine learning techniques for predicting compressive, splitting tensile, and flexural strength of concrete with metakaolin

## Supplementary Information

Table S1: Experimental database of  $f'_c$  of concrete with metakaolin.

| S.No. | Cement (kg/m <sup>3</sup> ) | Metakaolin (kg/m <sup>3</sup> ) | w/b      | Fine aggregate (kg/m <sup>3</sup> ) | Coarse aggregate (kg/m <sup>3</sup> ) | SP (kg/m <sup>3</sup> ) | Days | $f'_c$ (MPa) | Geometry of Specimen (mm) | Ref. |
|-------|-----------------------------|---------------------------------|----------|-------------------------------------|---------------------------------------|-------------------------|------|--------------|---------------------------|------|
| 1     | 335.4                       | 0                               | 0.4      | 670.8                               | 1341.2                                | 0                       | 28   | 19.5         | cube 100                  | [1]  |
| 2     | 251.47                      | 62.87                           | 0.599987 | 628.68                              | 1257.4                                | 0                       | 28   | 13           |                           |      |
| 3     | 259.6                       | 64.9                            | 0.5      | 649                                 | 1298                                  | 0                       | 28   | 14.7         |                           |      |
| 4     | 267.17                      | 47.15                           | 0.600025 | 628.68                              | 1257.4                                | 0                       | 28   | 15           |                           |      |
| 5     | 268.32                      | 67.08                           | 0.4      | 670.8                               | 1341.2                                | 0                       | 28   | 17           |                           |      |
| 6     | 275.83                      | 48.68                           | 0.499985 | 649                                 | 1298                                  | 0                       | 28   | 16           |                           |      |
| 7     | 282.91                      | 31.43                           | 0.599987 | 628.68                              | 1257.4                                | 0                       | 28   | 19           |                           |      |
| 8     | 285.09                      | 50.31                           | 0.4      | 670.8                               | 1341.2                                | 0                       | 28   | 20           |                           |      |
| 9     | 292.05                      | 32.45                           | 0.5      | 649                                 | 1298                                  | 0                       | 28   | 20           |                           |      |
| 10    | 298.62                      | 15.72                           | 0.599987 | 628.68                              | 1257.4                                | 0                       | 28   | 17.7         |                           |      |
| 11    | 301.86                      | 33.54                           | 0.4      | 670.8                               | 1341.2                                | 0                       | 28   | 21           |                           |      |
| 12    | 305.9                       | 76.5                            | 0.599895 | 573.5                               | 1147.02                               | 0                       | 28   | 16           |                           |      |
| 13    | 308.28                      | 16.23                           | 0.499985 | 649                                 | 1298                                  | 0                       | 28   | 19.8         |                           |      |
| 14    | 314.34                      | 0                               | 0.599987 | 628.68                              | 1257.4                                | 0                       | 28   | 17           |                           |      |
| 15    | 318.08                      | 79.52                           | 0.5      | 596.4                               | 1192.8                                | 0                       | 28   | 16.3         |                           |      |
| 16    | 318.63                      | 16.77                           | 0.4      | 670.8                               | 1341.2                                | 0                       | 28   | 20.2         |                           |      |
| 17    | 324.5                       | 0                               | 0.5      | 649                                 | 1298                                  | 0                       | 28   | 18           |                           |      |
| 18    | 325                         | 57.35                           | 0.599974 | 573.5                               | 1147.02                               | 0                       | 28   | 18.41        |                           |      |
| 19    | 331.2                       | 82.8                            | 0.4      | 621                                 | 1242                                  | 0                       | 28   | 14.5         |                           |      |
| 20    | 337.96                      | 59.64                           | 0.5      | 596.4                               | 1192.8                                | 0                       | 28   | 18.5         |                           |      |
| 21    | 344.12                      | 38.32                           | 0.599833 | 573.5                               | 1147.02                               | 0                       | 28   | 25.53        |                           |      |
| 22    | 351.9                       | 62.1                            | 0.4      | 621                                 | 1242                                  | 0                       | 28   | 19           |                           |      |
| 23    | 357.84                      | 39.76                           | 0.5      | 596.4                               | 1192.8                                | 0                       | 28   | 25           |                           |      |
| 24    | 363.2                       | 19.12                           | 0.600021 | 573.5                               | 1147.02                               | 0                       | 28   | 24           |                           |      |
| 25    | 372.6                       | 41.4                            | 0.4      | 621                                 | 1242                                  | 0                       | 28   | 25.66        |                           |      |
| 26    | 377.7                       | 19.88                           | 0.500025 | 596.4                               | 1192.8                                | 0                       | 28   | 23.65        |                           |      |
| 27    | 382.34                      | 0                               | 0.59999  | 573.5                               | 1147.02                               | 0                       | 28   | 23.43        |                           |      |
| 28    | 393.3                       | 20.7                            | 0.4      | 621                                 | 1242                                  | 0                       | 28   | 24.2         |                           |      |
| 29    | 397.6                       | 0                               | 0.5      | 596.4                               | 1192.8                                | 0                       | 28   | 22.22        |                           |      |
| 30    | 414                         | 0                               | 0.4      | 621                                 | 1242                                  | 0                       | 28   | 23.4         |                           |      |
| 31    | 426                         | 0                               | 0.380282 | 720                                 | 1080                                  | 4.26                    | 28   | 38.5         | cylinder 100*200          | [2]  |
| 32    | 362                         | 64                              | 0.380282 | 720                                 | 1080                                  | 4.26                    | 28   | 69.2         |                           |      |
| 33    | 383                         | 43                              | 0.380282 | 720                                 | 1080                                  | 4.26                    | 28   | 63.6         |                           |      |

|    |        |       |          |     |      |      |    |        |          |     |
|----|--------|-------|----------|-----|------|------|----|--------|----------|-----|
| 34 | 405    | 21    | 0.380282 | 720 | 1080 | 4.26 | 28 | 45.9   |          |     |
| 35 | 533.33 | 0     | 0.300002 | 677 | 1201 | 2.13 | 3  | 56.4   | cube 100 | [3] |
| 36 | 453.33 | 80    | 0.300002 | 645 | 1144 | 4.26 | 3  | 48.93  |          |     |
| 37 | 453.33 | 80    | 0.300002 | 645 | 1144 | 4.26 | 7  | 79.88  |          |     |
| 38 | 453.33 | 80    | 0.300002 | 645 | 1144 | 4.26 | 28 | 91.04  |          |     |
| 39 | 453.33 | 80    | 0.300002 | 645 | 1144 | 4.26 | 90 | 102.96 |          |     |
| 40 | 480    | 53.33 | 0.300002 | 655 | 1163 | 3.47 | 3  | 53.96  |          |     |
| 41 | 480    | 53.33 | 0.300002 | 655 | 1163 | 3.47 | 7  | 77.85  |          |     |
| 42 | 480    | 53.33 | 0.300002 | 655 | 1163 | 3.47 | 28 | 98.81  |          |     |
| 43 | 480    | 53.33 | 0.300002 | 655 | 1163 | 3.47 | 90 | 106.13 |          |     |
| 44 | 506.67 | 26.67 | 0.299996 | 666 | 1182 | 2.93 | 3  | 59.45  |          |     |
| 45 | 506.67 | 26.67 | 0.299996 | 666 | 1182 | 2.93 | 7  | 78.74  |          |     |
| 46 | 506.67 | 26.67 | 0.299996 | 666 | 1182 | 2.93 | 28 | 95.6   |          |     |
| 47 | 506.67 | 26.67 | 0.299996 | 666 | 1182 | 2.93 | 90 | 102.5  |          |     |
| 48 | 533.33 | 0     | 0.300002 | 677 | 1201 | 2.13 | 7  | 78.23  |          |     |
| 49 | 533.33 | 0     | 0.300002 | 677 | 1201 | 2.13 | 28 | 91.87  |          |     |
| 50 | 533.33 | 0     | 0.300002 | 677 | 1201 | 2.13 | 90 | 101    |          |     |
| 51 | 500    | 0     | 0.3      | 725 | 1087 | 0.5  | 3  | 68.5   | cube 100 | [4] |
| 52 | 328    | 82    | 0.5      | 653 | 1081 | 0    | 3  | 30     |          |     |
| 53 | 328    | 82    | 0.5      | 653 | 1081 | 0    | 7  | 43.2   |          |     |
| 54 | 328    | 82    | 0.5      | 653 | 1081 | 0    | 28 | 58.4   |          |     |
| 55 | 328    | 82    | 0.5      | 653 | 1081 | 0    | 90 | 69.1   |          |     |
| 56 | 369    | 41    | 0.5      | 656 | 1081 | 0    | 3  | 40.4   |          |     |
| 57 | 369    | 41    | 0.5      | 656 | 1081 | 0    | 7  | 55.2   |          |     |
| 58 | 369    | 41    | 0.5      | 656 | 1081 | 0    | 28 | 66.2   |          |     |
| 59 | 369    | 41    | 0.5      | 656 | 1081 | 0    | 90 | 71.6   |          |     |
| 60 | 390    | 20.5  | 0.5      | 659 | 1081 | 0    | 3  | 32.6   |          |     |
| 61 | 390    | 20.5  | 0.5      | 659 | 1081 | 0    | 7  | 45.9   |          |     |
| 62 | 390    | 20.5  | 0.5      | 659 | 1081 | 0    | 28 | 57.1   |          |     |
| 63 | 390    | 20.5  | 0.5      | 659 | 1081 | 0    | 90 | 66.5   |          |     |
| 64 | 400    | 100   | 0.3      | 708 | 1087 | 1    | 3  | 70.8   |          |     |
| 65 | 400    | 100   | 0.3      | 708 | 1087 | 1    | 7  | 87.6   |          |     |
| 66 | 400    | 100   | 0.3      | 708 | 1087 | 1    | 28 | 99.6   |          |     |
| 67 | 410    | 0     | 0.5      | 662 | 1081 | 0    | 3  | 28.6   |          |     |
| 68 | 410    | 0     | 0.5      | 662 | 1081 | 0    | 7  | 41.2   |          |     |
| 69 | 410    | 0     | 0.5      | 662 | 1081 | 0    | 28 | 52.1   |          |     |
| 70 | 410    | 0     | 0.5      | 662 | 1081 | 0    | 90 | 60.4   |          |     |
| 71 | 450    | 50    | 0.3      | 717 | 1087 | 0.8  | 3  | 85.9   |          |     |
| 72 | 450    | 50    | 0.3      | 717 | 1087 | 0.8  | 7  | 99.8   |          |     |
| 73 | 475    | 25    | 0.3      | 721 | 1087 | 0.6  | 3  | 73     |          |     |
| 74 | 475    | 25    | 0.3      | 721 | 1087 | 0.6  | 7  | 88.8   |          |     |
| 75 | 475    | 25    | 0.3      | 721 | 1087 | 0.6  | 28 | 103.6  |          |     |
| 76 | 500    | 0     | 0.3      | 725 | 1087 | 0.5  | 7  | 81.1   |          |     |

|     |     |      |      |     |      |      |    |       |          |     |
|-----|-----|------|------|-----|------|------|----|-------|----------|-----|
| 77  | 500 | 0    | 0.3  | 725 | 1087 | 0.5  | 28 | 96.5  | cube 100 | [5] |
| 78  | 500 | 0    | 0.3  | 725 | 1087 | 0.5  | 90 | 102.5 |          |     |
| 79  | 490 | 0    | 0.32 | 967 | 817  | 2.47 | 3  | 19.5  |          |     |
| 80  | 348 | 87   | 0.45 | 945 | 785  | 3.91 | 3  | 13.8  |          |     |
| 81  | 348 | 87   | 0.45 | 945 | 785  | 3.91 | 7  | 22    |          |     |
| 82  | 348 | 87   | 0.45 | 945 | 785  | 3.91 | 14 | 30    |          |     |
| 83  | 348 | 87   | 0.45 | 945 | 785  | 3.91 | 28 | 35.6  |          |     |
| 84  | 348 | 87   | 0.45 | 945 | 785  | 3.91 | 56 | 43.2  |          |     |
| 85  | 368 | 92   | 0.38 | 970 | 781  | 4.89 | 3  | 19    |          |     |
| 86  | 368 | 92   | 0.38 | 970 | 781  | 4.89 | 7  | 32    |          |     |
| 87  | 368 | 92   | 0.38 | 970 | 781  | 4.89 | 14 | 41.4  |          |     |
| 88  | 368 | 92   | 0.38 | 970 | 781  | 4.89 | 28 | 46    |          |     |
| 89  | 368 | 92   | 0.38 | 970 | 781  | 4.89 | 56 | 53.2  |          |     |
| 90  | 370 | 65.2 | 0.45 | 940 | 795  | 3.26 | 3  | 14.6  |          |     |
| 91  | 370 | 65.2 | 0.45 | 940 | 795  | 3.26 | 7  | 23.6  |          |     |
| 92  | 370 | 65.2 | 0.45 | 940 | 795  | 3.26 | 14 | 32.5  |          |     |
| 93  | 370 | 65.2 | 0.45 | 940 | 795  | 3.26 | 28 | 38.3  |          |     |
| 94  | 370 | 65.2 | 0.45 | 940 | 795  | 3.26 | 56 | 45.4  |          |     |
| 95  | 391 | 69   | 0.38 | 964 | 790  | 4.89 | 3  | 19.9  |          |     |
| 96  | 391 | 69   | 0.38 | 964 | 790  | 4.89 | 7  | 34.6  |          |     |
| 97  | 391 | 69   | 0.38 | 964 | 790  | 4.89 | 14 | 43.1  |          |     |
| 98  | 391 | 69   | 0.38 | 964 | 790  | 4.89 | 28 | 49.1  |          |     |
| 99  | 391 | 69   | 0.38 | 964 | 790  | 4.89 | 56 | 54.5  |          |     |
| 100 | 392 | 98   | 0.32 | 985 | 795  | 9.96 | 3  | 20    |          |     |
| 101 | 392 | 43.5 | 0.45 | 933 | 800  | 2.93 | 3  | 15.5  |          |     |
| 102 | 392 | 98   | 0.32 | 985 | 795  | 9.96 | 7  | 36    |          |     |
| 103 | 392 | 43.5 | 0.45 | 933 | 800  | 2.93 | 7  | 24    |          |     |
| 104 | 392 | 98   | 0.32 | 985 | 795  | 9.96 | 14 | 42    |          |     |
| 105 | 392 | 43.5 | 0.45 | 933 | 800  | 2.93 | 14 | 31.8  |          |     |
| 106 | 392 | 98   | 0.32 | 985 | 795  | 9.96 | 28 | 47    |          |     |
| 107 | 392 | 43.5 | 0.45 | 933 | 800  | 2.93 | 28 | 36.8  |          |     |
| 108 | 392 | 98   | 0.32 | 985 | 795  | 9.96 | 56 | 54.9  |          |     |
| 109 | 392 | 43.5 | 0.45 | 933 | 800  | 2.93 | 56 | 46.5  |          |     |
| 110 | 414 | 46   | 0.38 | 958 | 800  | 3.6  | 3  | 20    |          |     |
| 111 | 414 | 21.8 | 0.45 | 925 | 805  | 1.95 | 3  | 13.9  |          |     |
| 112 | 414 | 46   | 0.38 | 958 | 800  | 3.6  | 7  | 33.3  |          |     |
| 113 | 414 | 21.8 | 0.45 | 925 | 805  | 1.95 | 7  | 22.5  |          |     |
| 114 | 414 | 46   | 0.38 | 958 | 800  | 3.6  | 14 | 42.3  |          |     |
| 115 | 414 | 21.8 | 0.45 | 925 | 805  | 1.95 | 14 | 30.4  |          |     |
| 116 | 414 | 46   | 0.38 | 958 | 800  | 3.6  | 28 | 49.5  |          |     |
| 117 | 414 | 21.8 | 0.45 | 925 | 805  | 1.95 | 28 | 34    |          |     |
| 118 | 414 | 46   | 0.38 | 958 | 800  | 3.6  | 56 | 53.9  |          |     |
| 119 | 414 | 21.8 | 0.45 | 925 | 805  | 1.95 | 56 | 42.4  |          |     |

|     |     |      |      |     |     |      |     |      |          |     |
|-----|-----|------|------|-----|-----|------|-----|------|----------|-----|
| 120 | 417 | 73.5 | 0.32 | 980 | 800 | 7.35 | 3   | 22   |          |     |
| 121 | 417 | 73.5 | 0.32 | 980 | 800 | 7.35 | 7   | 38.7 |          |     |
| 122 | 417 | 73.5 | 0.32 | 980 | 800 | 7.35 | 14  | 44.5 |          |     |
| 123 | 417 | 73.5 | 0.32 | 980 | 800 | 7.35 | 28  | 51.4 |          |     |
| 124 | 417 | 73.5 | 0.32 | 980 | 800 | 7.35 | 56  | 59.3 |          |     |
| 125 | 435 | 0    | 0.45 | 920 | 815 | 1.63 | 3   | 13   |          |     |
| 126 | 435 | 0    | 0.45 | 920 | 815 | 1.63 | 7   | 19   |          |     |
| 127 | 435 | 0    | 0.45 | 920 | 815 | 1.63 | 14  | 26.3 |          |     |
| 128 | 435 | 0    | 0.45 | 920 | 815 | 1.63 | 28  | 31.2 |          |     |
| 129 | 435 | 0    | 0.45 | 920 | 815 | 1.63 | 56  | 39.9 |          |     |
| 130 | 437 | 23   | 0.38 | 947 | 810 | 3.31 | 3   | 19.3 |          |     |
| 131 | 437 | 23   | 0.38 | 947 | 810 | 3.31 | 7   | 32   |          |     |
| 132 | 437 | 23   | 0.38 | 947 | 810 | 3.31 | 14  | 40.5 |          |     |
| 133 | 437 | 23   | 0.38 | 947 | 810 | 3.31 | 28  | 45.7 |          |     |
| 134 | 437 | 23   | 0.38 | 947 | 810 | 3.31 | 56  | 51.6 |          |     |
| 135 | 441 | 49   | 0.32 | 975 | 805 | 7.02 | 3   | 23.5 |          |     |
| 136 | 441 | 49   | 0.32 | 975 | 805 | 7.02 | 7   | 40   |          |     |
| 137 | 441 | 49   | 0.32 | 975 | 805 | 7.02 | 14  | 45.8 |          |     |
| 138 | 441 | 49   | 0.32 | 975 | 805 | 7.02 | 28  | 53.6 |          |     |
| 139 | 441 | 49   | 0.32 | 975 | 805 | 7.02 | 56  | 60   |          |     |
| 140 | 460 | 0    | 0.38 | 940 | 815 | 1.73 | 3   | 18   |          |     |
| 141 | 460 | 0    | 0.38 | 940 | 815 | 1.73 | 7   | 30.3 |          |     |
| 142 | 460 | 0    | 0.38 | 940 | 815 | 1.73 | 14  | 35.2 |          |     |
| 143 | 460 | 0    | 0.38 | 940 | 815 | 1.73 | 28  | 41.9 |          |     |
| 144 | 460 | 0    | 0.38 | 940 | 815 | 1.73 | 56  | 45.9 |          |     |
| 145 | 466 | 24.5 | 0.32 | 967 | 815 | 4.57 | 3   | 20   |          |     |
| 146 | 466 | 24.5 | 0.32 | 967 | 815 | 4.57 | 7   | 36   |          |     |
| 147 | 466 | 24.5 | 0.32 | 967 | 815 | 4.57 | 14  | 43   |          |     |
| 148 | 466 | 24.5 | 0.32 | 967 | 815 | 4.57 | 28  | 49.2 |          |     |
| 149 | 466 | 24.5 | 0.32 | 967 | 815 | 4.57 | 56  | 58   |          |     |
| 150 | 490 | 0    | 0.32 | 967 | 817 | 2.47 | 7   | 33.8 |          |     |
| 151 | 490 | 0    | 0.32 | 967 | 817 | 2.47 | 14  | 37   |          |     |
| 152 | 490 | 0    | 0.32 | 967 | 817 | 2.47 | 28  | 45   |          |     |
| 153 | 490 | 0    | 0.32 | 967 | 817 | 2.47 | 56  | 53.2 |          |     |
| 154 | 400 | 0    | 0.5  | 935 | 765 | 0    | 7   | 19   | cube 100 | [6] |
| 155 | 340 | 60   | 0.5  | 935 | 765 | 0    | 7   | 25.1 |          |     |
| 156 | 340 | 60   | 0.5  | 935 | 765 | 0    | 28  | 40   |          |     |
| 157 | 340 | 60   | 0.5  | 935 | 765 | 0    | 90  | 48   |          |     |
| 158 | 340 | 60   | 0.5  | 935 | 765 | 0    | 180 | 51.5 |          |     |
| 159 | 350 | 50   | 0.5  | 935 | 765 | 0    | 7   | 23   |          |     |
| 160 | 350 | 50   | 0.5  | 935 | 765 | 0    | 28  | 40   |          |     |
| 161 | 350 | 50   | 0.5  | 935 | 765 | 0    | 90  | 47.2 |          |     |
| 162 | 350 | 50   | 0.5  | 935 | 765 | 0    | 180 | 50.5 |          |     |

|     |     |    |      |     |     |      |     |       |          |     |
|-----|-----|----|------|-----|-----|------|-----|-------|----------|-----|
| 163 | 360 | 40 | 0.5  | 935 | 765 | 0    | 7   | 26    |          |     |
| 164 | 360 | 40 | 0.5  | 935 | 765 | 0    | 28  | 41    |          |     |
| 165 | 360 | 40 | 0.5  | 935 | 765 | 0    | 90  | 46    |          |     |
| 166 | 360 | 40 | 0.5  | 935 | 765 | 0    | 180 | 50    |          |     |
| 167 | 400 | 0  | 0.5  | 935 | 765 | 0    | 28  | 35.5  |          |     |
| 168 | 400 | 0  | 0.5  | 935 | 765 | 0    | 90  | 43    |          |     |
| 169 | 400 | 0  | 0.5  | 935 | 765 | 0    | 180 | 48.5  |          |     |
| 170 | 450 | 0  | 0.35 | 957 | 852 | 7.9  | 1   | 29    | cube 100 | [7] |
| 171 | 280 | 70 | 0.55 | 953 | 848 | 6.1  | 1   | 15    |          |     |
| 172 | 280 | 70 | 0.55 | 953 | 848 | 6.1  | 3   | 30    |          |     |
| 173 | 280 | 70 | 0.55 | 953 | 848 | 6.1  | 7   | 39.25 |          |     |
| 174 | 280 | 70 | 0.55 | 953 | 848 | 6.1  | 28  | 52.5  |          |     |
| 175 | 280 | 70 | 0.55 | 953 | 848 | 6.1  | 90  | 61.5  |          |     |
| 176 | 280 | 70 | 0.55 | 953 | 848 | 6.1  | 120 | 70    |          |     |
| 177 | 315 | 35 | 0.55 | 956 | 851 | 4.4  | 1   | 13    |          |     |
| 178 | 315 | 35 | 0.55 | 956 | 851 | 4.4  | 3   | 26.5  |          |     |
| 179 | 315 | 35 | 0.55 | 956 | 851 | 4.4  | 7   | 36.5  |          |     |
| 180 | 315 | 35 | 0.55 | 956 | 851 | 4.4  | 28  | 50    |          |     |
| 181 | 315 | 35 | 0.55 | 956 | 851 | 4.4  | 90  | 59    |          |     |
| 182 | 315 | 35 | 0.55 | 956 | 851 | 4.4  | 120 | 66.5  |          |     |
| 183 | 350 | 0  | 0.55 | 960 | 854 | 3.5  | 1   | 13    |          |     |
| 184 | 350 | 0  | 0.55 | 960 | 854 | 3.5  | 3   | 24.5  |          |     |
| 185 | 350 | 0  | 0.55 | 960 | 854 | 3.5  | 7   | 33    |          |     |
| 186 | 350 | 0  | 0.55 | 960 | 854 | 3.5  | 28  | 46    |          |     |
| 187 | 350 | 0  | 0.55 | 960 | 854 | 3.5  | 90  | 50.05 |          |     |
| 188 | 350 | 0  | 0.55 | 960 | 854 | 3.5  | 120 | 54.5  |          |     |
| 189 | 360 | 90 | 0.35 | 948 | 844 | 12.4 | 1   | 31    |          |     |
| 190 | 360 | 90 | 0.35 | 948 | 844 | 12.4 | 3   | 52    |          |     |
| 191 | 360 | 90 | 0.35 | 948 | 844 | 12.4 | 7   | 67    |          |     |
| 192 | 360 | 90 | 0.35 | 948 | 844 | 12.4 | 28  | 78.5  |          |     |
| 193 | 360 | 90 | 0.35 | 948 | 844 | 12.4 | 90  | 93    |          |     |
| 194 | 360 | 90 | 0.35 | 948 | 844 | 12.4 | 120 | 98.5  |          |     |
| 195 | 405 | 45 | 0.35 | 952 | 848 | 10.1 | 1   | 33    |          |     |
| 196 | 405 | 45 | 0.35 | 952 | 848 | 10.1 | 3   | 48    |          |     |
| 197 | 405 | 45 | 0.35 | 952 | 848 | 10.1 | 7   | 58    |          |     |
| 198 | 405 | 45 | 0.35 | 952 | 848 | 10.1 | 28  | 75    |          |     |
| 199 | 405 | 45 | 0.35 | 952 | 848 | 10.1 | 90  | 85.5  |          |     |
| 200 | 405 | 45 | 0.35 | 952 | 848 | 10.1 | 120 | 92    |          |     |
| 201 | 450 | 0  | 0.35 | 957 | 852 | 7.9  | 3   | 50    |          |     |
| 202 | 450 | 0  | 0.35 | 957 | 852 | 7.9  | 7   | 54    |          |     |
| 203 | 450 | 0  | 0.35 | 957 | 852 | 7.9  | 28  | 69    |          |     |
| 204 | 450 | 0  | 0.35 | 957 | 852 | 7.9  | 90  | 72    |          |     |
| 205 | 450 | 0  | 0.35 | 957 | 852 | 7.9  | 120 | 77    |          |     |

|     |        |       |          |        |         |        |    |       |          |      |
|-----|--------|-------|----------|--------|---------|--------|----|-------|----------|------|
| 206 | 437.78 | 0     | 0.449998 | 643.68 | 1104.36 | 0      | 7  | 28.74 | cube 150 | [8]  |
| 207 | 350.22 | 87.56 | 0.449998 | 643.68 | 1104.36 | 0      | 7  | 38.96 |          |      |
| 208 | 350.22 | 87.56 | 0.449998 | 643.68 | 1104.36 | 0      | 28 | 45.49 |          |      |
| 209 | 372.11 | 65.67 | 0.449998 | 643.68 | 1104.36 | 0      | 7  | 41.19 |          |      |
| 210 | 372.11 | 65.67 | 0.449998 | 643.68 | 1104.36 | 0      | 28 | 51.56 |          |      |
| 211 | 394    | 43.78 | 0.449998 | 643.68 | 1104.36 | 0      | 7  | 38.07 |          |      |
| 212 | 394    | 43.78 | 0.449998 | 643.68 | 1104.36 | 0      | 28 | 43.7  |          |      |
| 213 | 415.89 | 21.89 | 0.449998 | 643.68 | 1104.36 | 0      | 7  | 32.07 |          |      |
| 214 | 415.89 | 21.89 | 0.449998 | 643.68 | 1104.36 | 0      | 28 | 38.22 |          |      |
| 215 | 437.78 | 0     | 0.449998 | 643.68 | 1104.36 | 0      | 28 | 37.04 |          |      |
| 216 | 482    | 0     | 0.30083  | 608    | 1254    | 6.5552 | 1  | 28.9  | cube 100 | [9]  |
| 217 | 447    | 96    | 0.309392 | 705    | 1454    | 7.3848 | 1  | 22.8  |          |      |
| 218 | 447    | 96    | 0.309392 | 705    | 1454    | 7.3848 | 7  | 62.8  |          |      |
| 219 | 447    | 96    | 0.309392 | 705    | 1454    | 7.3848 | 14 | 78.9  |          |      |
| 220 | 447    | 96    | 0.309392 | 705    | 1454    | 7.3848 | 28 | 83.2  |          |      |
| 221 | 447    | 96    | 0.309392 | 705    | 1454    | 7.3848 | 56 | 86.1  |          |      |
| 222 | 457    | 72    | 0.304348 | 678    | 1398    | 7.1944 | 1  | 28.6  |          |      |
| 223 | 457    | 72    | 0.304348 | 678    | 1398    | 7.1944 | 7  | 70.2  |          |      |
| 224 | 457    | 72    | 0.304348 | 678    | 1398    | 7.1944 | 14 | 83.6  |          |      |
| 225 | 457    | 72    | 0.304348 | 678    | 1398    | 7.1944 | 28 | 89.7  |          |      |
| 226 | 457    | 72    | 0.304348 | 678    | 1398    | 7.1944 | 56 | 91    |          |      |
| 227 | 462    | 60    | 0.302682 | 665    | 1372    | 7.0992 | 1  | 28.5  |          |      |
| 228 | 462    | 60    | 0.302682 | 665    | 1372    | 7.0992 | 7  | 68.6  |          |      |
| 229 | 462    | 60    | 0.302682 | 665    | 1372    | 7.0992 | 14 | 81.6  |          |      |
| 230 | 462    | 60    | 0.302682 | 665    | 1372    | 7.0992 | 28 | 85.3  |          |      |
| 231 | 462    | 60    | 0.302682 | 665    | 1372    | 7.0992 | 56 | 90.4  |          |      |
| 232 | 470    | 36    | 0.302372 | 641    | 1322    | 6.8816 | 1  | 25.1  |          |      |
| 233 | 470    | 36    | 0.302372 | 641    | 1322    | 6.8816 | 7  | 62.2  |          |      |
| 234 | 470    | 36    | 0.302372 | 641    | 1322    | 6.8816 | 14 | 74.4  |          |      |
| 235 | 470    | 36    | 0.302372 | 641    | 1322    | 6.8816 | 28 | 81.4  |          |      |
| 236 | 470    | 36    | 0.302372 | 641    | 1322    | 6.8816 | 56 | 85.7  |          |      |
| 237 | 474    | 24    | 0.301205 | 629    | 1298    | 6.7728 | 1  | 30.6  |          |      |
| 238 | 474    | 24    | 0.301205 | 629    | 1298    | 6.7728 | 7  | 59.2  |          |      |
| 239 | 474    | 24    | 0.301205 | 629    | 1298    | 6.7728 | 14 | 67.7  |          |      |
| 240 | 474    | 24    | 0.301205 | 629    | 1298    | 6.7728 | 28 | 72.5  |          |      |
| 241 | 474    | 24    | 0.301205 | 629    | 1298    | 6.7728 | 56 | 79    |          |      |
| 242 | 482    | 0     | 0.30083  | 608    | 1254    | 6.5552 | 7  | 55.3  |          |      |
| 243 | 482    | 0     | 0.30083  | 608    | 1254    | 6.5552 | 14 | 60.7  |          |      |
| 244 | 482    | 0     | 0.30083  | 608    | 1254    | 6.5552 | 28 | 66.1  |          |      |
| 245 | 482    | 0     | 0.30083  | 608    | 1254    | 6.5552 | 56 | 71.3  |          |      |
| 246 | 480    | 0     | 0.44     | 900    | 670     | 7.2    | 7  | 27.53 | cube 150 | [10] |
| 247 | 408    | 72    | 0.44     | 900    | 670     | 8.64   | 7  | 38.1  |          |      |
| 248 | 408    | 72    | 0.44     | 900    | 670     | 8.64   | 28 | 51.7  |          |      |

|     |     |       |          |       |      |      |    |       |          |      |
|-----|-----|-------|----------|-------|------|------|----|-------|----------|------|
| 249 | 432 | 48    | 0.44     | 900   | 670  | 8.64 | 7  | 35.8  |          |      |
| 250 | 432 | 48    | 0.44     | 900   | 670  | 8.64 | 28 | 47.9  |          |      |
| 251 | 456 | 24    | 0.44     | 900   | 670  | 8.64 | 7  | 32.6  |          |      |
| 252 | 456 | 24    | 0.44     | 900   | 670  | 8.64 | 28 | 45.5  |          |      |
| 253 | 480 | 0     | 0.44     | 900   | 670  | 7.2  | 28 | 41.4  |          |      |
| 254 | 512 | 0     | 0.319141 | 594   | 1037 | 5.12 | 3  | 28.84 | cube 100 | [11] |
| 255 | 512 | 51.2  | 0.290128 | 594   | 1037 | 5.12 | 3  | 29.18 |          |      |
| 256 | 512 | 76.8  | 0.277514 | 594   | 1037 | 5.12 | 3  | 29.69 |          |      |
| 257 | 512 | 102.4 | 0.265951 | 594   | 1037 | 5.12 | 3  | 29.01 |          |      |
| 258 | 512 | 153.6 | 0.245493 | 594   | 1037 | 5.12 | 3  | 26.8  |          |      |
| 259 | 512 | 204.8 | 0.227958 | 594   | 1037 | 5.12 | 3  | 25.96 |          |      |
| 260 | 512 | 256   | 0.21276  | 594   | 1037 | 5.12 | 3  | 24.09 |          |      |
| 261 | 512 | 0     | 0.319141 | 594   | 1037 | 5.12 | 7  | 46.48 |          |      |
| 262 | 512 | 51.2  | 0.290128 | 594   | 1037 | 5.12 | 7  | 50.73 |          |      |
| 263 | 512 | 76.8  | 0.277514 | 594   | 1037 | 5.12 | 7  | 53.61 |          |      |
| 264 | 512 | 102.4 | 0.265951 | 594   | 1037 | 5.12 | 7  | 50.39 |          |      |
| 265 | 512 | 153.6 | 0.245493 | 594   | 1037 | 5.12 | 7  | 48.25 |          |      |
| 266 | 512 | 204.8 | 0.227958 | 594   | 1037 | 5.12 | 7  | 44.96 |          |      |
| 267 | 512 | 256   | 0.21276  | 594   | 1037 | 5.12 | 7  | 42.41 |          |      |
| 268 | 512 | 0     | 0.319141 | 594   | 1037 | 5.12 | 28 | 61.07 |          |      |
| 269 | 512 | 51.2  | 0.290128 | 594   | 1037 | 5.12 | 28 | 70.74 |          |      |
| 270 | 512 | 76.8  | 0.277514 | 594   | 1037 | 5.12 | 28 | 74.48 |          |      |
| 271 | 512 | 102.4 | 0.265951 | 594   | 1037 | 5.12 | 28 | 69.73 |          |      |
| 272 | 512 | 153.6 | 0.245493 | 594   | 1037 | 5.12 | 28 | 65.82 |          |      |
| 273 | 512 | 204.8 | 0.227958 | 594   | 1037 | 5.12 | 28 | 62.26 |          |      |
| 274 | 512 | 256   | 0.21276  | 594   | 1037 | 5.12 | 28 | 59.89 |          |      |
| 275 | 400 | 0     | 0.5      | 545   | 1012 | 0    | 7  | 26    | cube 150 | [12] |
| 276 | 400 | 10    | 0.554268 | 490.5 | 1012 | 0    | 7  | 27.5  |          |      |
| 277 | 400 | 20    | 0.605952 | 436   | 1012 | 0    | 7  | 29.5  |          |      |
| 278 | 400 | 30    | 0.655233 | 317.8 | 1012 | 0    | 7  | 31.25 |          |      |
| 279 | 400 | 40    | 0.702273 | 327   | 1012 | 0    | 7  | 33.5  |          |      |
| 280 | 400 | 50    | 0.747222 | 272.5 | 1012 | 0    | 7  | 25.5  |          |      |
| 281 | 400 | 0     | 0.5      | 545   | 1012 | 0    | 28 | 30.5  |          |      |
| 282 | 400 | 10    | 0.554268 | 490.5 | 1012 | 0    | 28 | 32.5  |          |      |
| 283 | 400 | 20    | 0.605952 | 436   | 1012 | 0    | 28 | 35    |          |      |
| 284 | 400 | 30    | 0.655233 | 317.8 | 1012 | 0    | 28 | 37.5  |          |      |
| 285 | 400 | 40    | 0.702273 | 327   | 1012 | 0    | 28 | 40    |          |      |
| 286 | 400 | 50    | 0.747222 | 272.5 | 1012 | 0    | 28 | 30    |          |      |
| 287 | 400 | 0     | 0.5      | 545   | 1012 | 0    | 91 | 38    |          |      |
| 288 | 400 | 10    | 0.554268 | 490.5 | 1012 | 0    | 91 | 39    |          |      |
| 289 | 400 | 20    | 0.605952 | 436   | 1012 | 0    | 91 | 41    |          |      |
| 290 | 400 | 30    | 0.655233 | 317.8 | 1012 | 0    | 91 | 42.5  |          |      |
| 291 | 400 | 40    | 0.702273 | 327   | 1012 | 0    | 91 | 47    |          |      |

|     |        |        |          |       |      |          |    |       |                     |      |
|-----|--------|--------|----------|-------|------|----------|----|-------|---------------------|------|
| 292 | 400    | 50     | 0.747222 | 272.5 | 1012 | 0        | 91 | 34.5  |                     |      |
| 293 | 450    | 0      | 0.45     | 482   | 1040 | 4.95     | 35 | 33    | cylinder<br>100*200 | [13] |
| 294 | 383    | 68     | 0.45     | 482   | 1040 | 4.95     | 35 | 32    |                     |      |
| 295 | 383    | 68     | 0.45     | 482   | 1040 | 4.95     | 56 | 30.25 |                     |      |
| 296 | 383    | 68     | 0.45     | 482   | 1040 | 4.95     | 84 | 34.25 |                     |      |
| 297 | 405    | 45     | 0.45     | 482   | 1040 | 4.95     | 35 | 29.25 |                     |      |
| 298 | 405    | 45     | 0.45     | 482   | 1040 | 4.95     | 56 | 34.75 |                     |      |
| 299 | 405    | 45     | 0.45     | 482   | 1040 | 4.95     | 84 | 39.25 |                     |      |
| 300 | 428    | 23     | 0.45     | 482   | 1040 | 4.95     | 35 | 34    |                     |      |
| 301 | 428    | 23     | 0.45     | 482   | 1040 | 4.95     | 56 | 36.5  |                     |      |
| 302 | 428    | 23     | 0.45     | 482   | 1040 | 4.95     | 84 | 42    |                     |      |
| 303 | 450    | 0      | 0.45     | 482   | 1040 | 4.95     | 56 | 38    |                     |      |
| 304 | 450    | 0      | 0.45     | 482   | 1040 | 4.95     | 84 | 43    |                     |      |
| 305 | 400    | 0      | 0.4      | 714   | 1165 | 2.4      | 3  | 27    | cube 100            | [14] |
| 306 | 364    | 36     | 0.4      | 714   | 1165 | 2.4      | 3  | 28.3  |                     |      |
| 307 | 364    | 36     | 0.4      | 714   | 1165 | 2.4      | 7  | 42.6  |                     |      |
| 308 | 364    | 36     | 0.4      | 714   | 1165 | 2.4      | 28 | 52    |                     |      |
| 309 | 376    | 24     | 0.4      | 714   | 1165 | 2.4      | 3  | 28    |                     |      |
| 310 | 376    | 24     | 0.4      | 714   | 1165 | 2.4      | 7  | 39    |                     |      |
| 311 | 376    | 24     | 0.4      | 714   | 1165 | 2.4      | 28 | 47    |                     |      |
| 312 | 388    | 12     | 0.4      | 714   | 1165 | 2.4      | 3  | 28    |                     |      |
| 313 | 388    | 12     | 0.4      | 714   | 1165 | 2.4      | 7  | 37.5  |                     |      |
| 314 | 388    | 12     | 0.4      | 714   | 1165 | 2.4      | 28 | 42    |                     |      |
| 315 | 400    | 0      | 0.4      | 714   | 1165 | 2.4      | 7  | 36.1  |                     |      |
| 316 | 400    | 0      | 0.4      | 714   | 1165 | 2.4      | 28 | 40    |                     |      |
| 317 | 516    | 0      | 0.31     | 348   | 1513 | 2.064    | 3  | 54.6  | cube 100            | [15] |
| 318 | 426.2  | 123.75 | 0.22     | 795   | 935  | 7.974275 | 3  | 57.7  |                     |      |
| 319 | 426.2  | 123.75 | 0.22     | 795   | 935  | 7.974275 | 7  | 94.25 |                     |      |
| 320 | 426.2  | 123.75 | 0.22     | 795   | 935  | 7.974275 | 28 | 107.5 |                     |      |
| 321 | 467.5  | 82.5   | 0.26     | 765   | 901  | 6.875    | 3  | 53.3  |                     |      |
| 322 | 467.5  | 82.5   | 0.26     | 765   | 901  | 6.875    | 7  | 87.07 |                     |      |
| 323 | 467.5  | 82.5   | 0.26     | 765   | 901  | 6.875    | 28 | 105.8 |                     |      |
| 324 | 508.75 | 41.25  | 0.31     | 739   | 870  | 4.95     | 3  | 54.9  |                     |      |
| 325 | 508.75 | 41.25  | 0.31     | 739   | 870  | 4.95     | 7  | 75.76 |                     |      |
| 326 | 508.75 | 41.25  | 0.31     | 739   | 870  | 4.95     | 28 | 94.1  |                     |      |
| 327 | 508.75 | 41.25  | 0.31     | 739   | 870  | 4.95     | 90 | 101.2 |                     |      |
| 328 | 516    | 0      | 0.31     | 348   | 1513 | 2.064    | 7  | 75.7  |                     |      |
| 329 | 516    | 0      | 0.31     | 348   | 1513 | 2.064    | 28 | 88.9  |                     |      |
| 330 | 516    | 0      | 0.31     | 348   | 1513 | 2.064    | 90 | 97.7  |                     |      |
| 331 | 596    | 0      | 0.26     | 337   | 1465 | 3.576    | 3  | 60.9  |                     |      |
| 332 | 596    | 0      | 0.26     | 337   | 1465 | 3.576    | 7  | 84.48 |                     |      |
| 333 | 596    | 0      | 0.26     | 337   | 1465 | 3.576    | 28 | 103.2 |                     |      |
| 334 | 681    | 0      | 0.22     | 325   | 1415 | 6.129    | 3  | 62    |                     |      |

|     |       |      |          |      |      |       |     |       |          |      |
|-----|-------|------|----------|------|------|-------|-----|-------|----------|------|
| 335 | 681   | 0    | 0.22     | 325  | 1415 | 6.129 | 7   | 86.05 | cube 150 | [16] |
| 336 | 681   | 0    | 0.22     | 325  | 1415 | 6.129 | 28  | 101.5 |          |      |
| 337 | 500   | 0    | 0.38     | 900  | 650  | 3     | 7   | 25    |          |      |
| 338 | 425   | 75   | 0.38     | 900  | 650  | 5     | 7   | 32    |          |      |
| 339 | 425   | 75   | 0.38     | 900  | 650  | 5     | 28  | 62.5  |          |      |
| 340 | 425   | 75   | 0.38     | 900  | 650  | 5     | 56  | 65    |          |      |
| 341 | 450   | 50   | 0.38     | 900  | 650  | 4     | 7   | 48    |          |      |
| 342 | 450   | 50   | 0.38     | 900  | 650  | 4     | 28  | 71    |          |      |
| 343 | 450   | 50   | 0.38     | 900  | 650  | 4     | 56  | 76    |          |      |
| 344 | 475   | 25   | 0.38     | 900  | 650  | 3     | 7   | 32.5  |          |      |
| 345 | 475   | 25   | 0.38     | 900  | 650  | 3     | 28  | 54    |          |      |
| 346 | 475   | 25   | 0.38     | 900  | 650  | 3     | 56  | 63.5  |          |      |
| 347 | 500   | 0    | 0.38     | 900  | 650  | 3     | 28  | 43    |          |      |
| 348 | 500   | 0    | 0.38     | 900  | 650  | 3     | 56  | 49.5  |          |      |
| 349 | 420   | 0    | 0.430952 | 668  | 1232 | 0     | 7   | 31.75 | cube 150 | [17] |
| 350 | 336   | 84   | 0.430952 | 668  | 1232 | 0     | 7   | 34.25 |          |      |
| 351 | 336   | 84   | 0.430952 | 668  | 1232 | 0     | 28  | 43.25 |          |      |
| 352 | 336   | 84   | 0.430952 | 668  | 1232 | 0     | 90  | 46.5  |          |      |
| 353 | 357   | 63   | 0.430952 | 668  | 1232 | 0     | 7   | 35.2  |          |      |
| 354 | 357   | 63   | 0.430952 | 668  | 1232 | 0     | 28  | 45.3  |          |      |
| 355 | 357   | 63   | 0.430952 | 668  | 1232 | 0     | 90  | 48.5  |          |      |
| 356 | 378   | 42   | 0.430952 | 668  | 1232 | 0     | 7   | 34.25 |          |      |
| 357 | 378   | 42   | 0.430952 | 668  | 1232 | 0     | 28  | 44.5  |          |      |
| 358 | 378   | 42   | 0.430952 | 668  | 1232 | 0     | 90  | 48    |          |      |
| 359 | 399   | 21   | 0.430952 | 668  | 1232 | 0     | 7   | 32.65 |          |      |
| 360 | 399   | 21   | 0.430952 | 668  | 1232 | 0     | 28  | 42.35 |          |      |
| 361 | 399   | 21   | 0.430952 | 668  | 1232 | 0     | 90  | 46.5  |          |      |
| 362 | 420   | 0    | 0.430952 | 668  | 1232 | 0     | 28  | 40.4  |          |      |
| 363 | 420   | 0    | 0.430952 | 668  | 1232 | 0     | 90  | 44.7  |          |      |
| 364 | 420   | 0    | 0.47     | 948  | 759  | 1.638 | 7   | 19    | cube 100 | [18] |
| 365 | 357   | 63   | 0.47     | 948  | 759  | 2.184 | 7   | 24.5  |          |      |
| 366 | 357   | 63   | 0.37     | 1007 | 802  | 2.604 | 7   | 39    |          |      |
| 367 | 357   | 63   | 0.47     | 948  | 759  | 2.184 | 28  | 40    |          |      |
| 368 | 357   | 63   | 0.37     | 1007 | 802  | 2.604 | 28  | 57    |          |      |
| 369 | 357   | 63   | 0.47     | 948  | 759  | 2.184 | 90  | 48    |          |      |
| 370 | 357   | 63   | 0.37     | 1007 | 802  | 2.604 | 90  | 57.5  |          |      |
| 371 | 357   | 63   | 0.47     | 948  | 759  | 2.184 | 180 | 51.4  |          |      |
| 372 | 357   | 63   | 0.37     | 1007 | 802  | 2.604 | 180 | 67    |          |      |
| 373 | 367.5 | 52.5 | 0.47     | 948  | 759  | 1.932 | 7   | 23    |          |      |
| 374 | 367.5 | 52.5 | 0.37     | 1007 | 802  | 2.226 | 7   | 41.5  |          |      |
| 375 | 367.5 | 52.5 | 0.47     | 948  | 759  | 1.932 | 28  | 40    |          |      |
| 376 | 367.5 | 52.5 | 0.37     | 1007 | 802  | 2.226 | 28  | 58.5  |          |      |
| 377 | 367.5 | 52.5 | 0.47     | 948  | 759  | 1.932 | 90  | 47.5  |          |      |

|     |        |       |          |        |         |       |     |       |          |      |
|-----|--------|-------|----------|--------|---------|-------|-----|-------|----------|------|
| 378 | 367.5  | 52.5  | 0.37     | 1007   | 802     | 2.226 | 90  | 66.5  |          |      |
| 379 | 367.5  | 52.5  | 0.47     | 948    | 759     | 1.932 | 180 | 50.05 |          |      |
| 380 | 367.5  | 52.5  | 0.37     | 1007   | 802     | 2.226 | 180 | 72    |          |      |
| 381 | 378    | 42    | 0.47     | 948    | 759     | 1.806 | 7   | 26    |          |      |
| 382 | 378    | 42    | 0.37     | 1007   | 802     | 1.932 | 7   | 38    |          |      |
| 383 | 378    | 42    | 0.47     | 948    | 759     | 1.806 | 28  | 41    |          |      |
| 384 | 378    | 42    | 0.37     | 1007   | 802     | 1.932 | 28  | 54    |          |      |
| 385 | 378    | 42    | 0.47     | 948    | 759     | 1.806 | 90  | 46    |          |      |
| 386 | 378    | 42    | 0.37     | 1007   | 802     | 1.932 | 90  | 55.05 |          |      |
| 387 | 378    | 42    | 0.47     | 948    | 759     | 1.806 | 180 | 50    |          |      |
| 388 | 378    | 42    | 0.37     | 1007   | 802     | 1.932 | 180 | 66    |          |      |
| 389 | 420    | 0     | 0.37     | 1007   | 802     | 1.722 | 7   | 27    |          |      |
| 390 | 420    | 0     | 0.47     | 948    | 759     | 1.638 | 28  | 35.5  |          |      |
| 391 | 420    | 0     | 0.37     | 1007   | 802     | 1.722 | 28  | 32.5  |          |      |
| 392 | 420    | 0     | 0.47     | 948    | 759     | 1.638 | 90  | 42.5  |          |      |
| 393 | 420    | 0     | 0.37     | 1007   | 802     | 1.722 | 90  | 60.5  |          |      |
| 394 | 420    | 0     | 0.47     | 948    | 759     | 1.638 | 180 | 48.5  |          |      |
| 395 | 420    | 0     | 0.37     | 1007   | 802     | 1.722 | 180 | 64    |          |      |
| 396 | 434.32 | 0     | 0.430006 | 624.77 | 1264.97 | 0     | 7   | 37    | cube 150 | [19] |
| 397 | 304.02 | 86.86 | 0.477794 | 624.77 | 1264.97 | 0     | 7   | 38    |          |      |
| 398 | 304.02 | 86.86 | 0.477794 | 843.43 | 822.23  | 1.52  | 7   | 42.4  |          |      |
| 399 | 304.02 | 86.86 | 0.477794 | 624.77 | 1264.97 | 0     | 28  | 55.2  |          |      |
| 400 | 304.02 | 86.86 | 0.477794 | 843.43 | 822.23  | 1.52  | 28  | 58    |          |      |
| 401 | 304.02 | 86.86 | 0.477794 | 624.77 | 1264.97 | 0     | 90  | 69.8  |          |      |
| 402 | 304.02 | 86.86 | 0.477794 | 843.43 | 822.23  | 1.52  | 90  | 66    |          |      |
| 403 | 325.74 | 65.12 | 0.477818 | 624.77 | 1264.97 | 0     | 7   | 40.3  |          |      |
| 404 | 325.74 | 65.12 | 0.477818 | 843.43 | 822.23  | 1.52  | 7   | 44.1  |          |      |
| 405 | 325.74 | 65.12 | 0.477818 | 624.77 | 1264.97 | 0     | 28  | 57.2  |          |      |
| 406 | 325.74 | 65.12 | 0.477818 | 843.43 | 822.23  | 1.52  | 28  | 60    |          |      |
| 407 | 325.74 | 65.12 | 0.477818 | 624.77 | 1264.97 | 0     | 90  | 72.7  |          |      |
| 408 | 325.74 | 65.12 | 0.477818 | 843.43 | 822.23  | 1.52  | 90  | 67.5  |          |      |
| 409 | 390.89 | 43.43 | 0.430006 | 624.77 | 1264.97 | 0     | 7   | 41.8  |          |      |
| 410 | 390.89 | 43.43 | 0.430006 | 843.43 | 822.23  | 1.52  | 7   | 57.9  |          |      |
| 411 | 390.89 | 43.43 | 0.430006 | 624.77 | 1264.97 | 0     | 28  | 64.5  |          |      |
| 412 | 390.89 | 43.43 | 0.430006 | 843.43 | 822.23  | 1.52  | 28  | 68.2  |          |      |
| 413 | 390.89 | 43.43 | 0.430006 | 624.77 | 1264.97 | 0     | 90  | 77.5  |          |      |
| 414 | 390.89 | 43.43 | 0.430006 | 843.43 | 822.23  | 1.52  | 90  | 79    |          |      |
| 415 | 412.6  | 21.72 | 0.430006 | 624.77 | 1264.97 | 0     | 7   | 38    |          |      |
| 416 | 412.6  | 21.72 | 0.430006 | 843.43 | 822.23  | 1.52  | 7   | 52.5  |          |      |
| 417 | 412.6  | 21.72 | 0.430006 | 624.77 | 1264.97 | 0     | 28  | 54.5  |          |      |
| 418 | 412.6  | 21.72 | 0.430006 | 843.43 | 822.23  | 1.52  | 28  | 62.4  |          |      |
| 419 | 412.6  | 21.72 | 0.430006 | 624.77 | 1264.97 | 0     | 90  | 68.8  |          |      |
| 420 | 412.6  | 21.72 | 0.430006 | 843.43 | 822.23  | 1.52  | 90  | 72.25 |          |      |

|     |        |      |          |        |         |        |    |       |                     |      |
|-----|--------|------|----------|--------|---------|--------|----|-------|---------------------|------|
| 421 | 434.32 | 0    | 0.430006 | 843.43 | 822.23  | 1.52   | 7  | 37.6  |                     |      |
| 422 | 434.32 | 0    | 0.430006 | 624.77 | 1264.97 | 0      | 28 | 51.25 |                     |      |
| 423 | 434.32 | 0    | 0.430006 | 843.43 | 822.23  | 1.52   | 28 | 46.2  |                     |      |
| 424 | 434.32 | 0    | 0.430006 | 624.77 | 1264.97 | 0      | 90 | 62.7  |                     |      |
| 425 | 434.32 | 0    | 0.430006 | 843.43 | 822.23  | 1.52   | 90 | 63.75 |                     |      |
| 426 | 350    | 0    | 0.5      | 720    | 1200    | 0.1995 | 3  | 38    | cylinder<br>100*200 | [20] |
| 427 | 280    | 70   | 0.5      | 720    | 1200    | 1.4    | 3  | 34    |                     |      |
| 428 | 280    | 70   | 0.5      | 720    | 1200    | 0.595  | 7  | 57    |                     |      |
| 429 | 280    | 70   | 0.5      | 720    | 1200    | 1.4    | 7  | 54.4  |                     |      |
| 430 | 280    | 70   | 0.5      | 720    | 1200    | 0.595  | 28 | 75.5  |                     |      |
| 431 | 280    | 70   | 0.5      | 720    | 1200    | 1.4    | 28 | 77.4  |                     |      |
| 432 | 280    | 70   | 0.5      | 720    | 1200    | 0.595  | 90 | 85    |                     |      |
| 433 | 280    | 70   | 0.5      | 720    | 1200    | 1.4    | 90 | 86    |                     |      |
| 434 | 315    | 35   | 0.5      | 720    | 1200    | 0.49   | 3  | 36    |                     |      |
| 435 | 315    | 35   | 0.5      | 720    | 1200    | 0.6335 | 3  | 42.5  |                     |      |
| 436 | 315    | 35   | 0.5      | 720    | 1200    | 0.49   | 7  | 54.4  |                     |      |
| 437 | 315    | 35   | 0.5      | 720    | 1200    | 0.6335 | 7  | 59.4  |                     |      |
| 438 | 315    | 35   | 0.5      | 720    | 1200    | 0.49   | 28 | 74    |                     |      |
| 439 | 315    | 35   | 0.5      | 720    | 1200    | 0.6335 | 28 | 80    |                     |      |
| 440 | 315    | 35   | 0.5      | 720    | 1200    | 0.49   | 90 | 80.4  |                     |      |
| 441 | 315    | 35   | 0.5      | 720    | 1200    | 0.6335 | 90 | 91.4  |                     |      |
| 442 | 350    | 0    | 0.5      | 720    | 1200    | 0.1995 | 7  | 49    |                     |      |
| 443 | 350    | 0    | 0.5      | 720    | 1200    | 0.1995 | 28 | 56    |                     |      |
| 444 | 350    | 0    | 0.5      | 720    | 1200    | 0.1995 | 90 | 67    |                     |      |
| 445 | 346    | 0    | 0.55     | 692    | 1038    | 0      | 7  | 18.8  | cylinder<br>100*200 | [21] |
| 446 | 259.5  | 86.5 | 0.55     | 692    | 1038    | 0      | 7  | 17    |                     |      |
| 447 | 259.5  | 86.5 | 0.55     | 692    | 1038    | 0      | 28 | 23.9  |                     |      |
| 448 | 276.8  | 69.2 | 0.55     | 692    | 1038    | 0      | 7  | 19    |                     |      |
| 449 | 276.8  | 69.2 | 0.55     | 692    | 1038    | 0      | 28 | 27    |                     |      |
| 450 | 294.1  | 51.9 | 0.55     | 692    | 1038    | 0      | 7  | 22    |                     |      |
| 451 | 294.1  | 51.9 | 0.55     | 692    | 1038    | 0      | 28 | 31.5  |                     |      |
| 452 | 311.4  | 34.6 | 0.55     | 692    | 1038    | 0      | 7  | 20.6  |                     |      |
| 453 | 311.4  | 34.6 | 0.55     | 692    | 1038    | 0      | 28 | 29.5  |                     |      |
| 454 | 328.7  | 17.3 | 0.55     | 692    | 1038    | 0      | 7  | 19    |                     |      |
| 455 | 328.7  | 17.3 | 0.55     | 692    | 1038    | 0      | 28 | 28    |                     |      |
| 456 | 346    | 0    | 0.55     | 692    | 1038    | 0      | 28 | 27.3  |                     |      |
| 457 | 510    | 0    | 0.317647 | 806    | 972     | 3      | 7  | 45.1  | cube 150            | [22] |
| 458 | 410    | 100  | 0.317647 | 806    | 972     | 4      | 7  | 51.4  |                     |      |
| 459 | 410    | 100  | 0.317647 | 806    | 972     | 4      | 28 | 69.6  |                     |      |
| 460 | 435    | 75   | 0.317647 | 806    | 972     | 3.8    | 7  | 54.8  |                     |      |
| 461 | 435    | 75   | 0.317647 | 806    | 972     | 3.8    | 28 | 72.7  |                     |      |
| 462 | 460    | 50   | 0.317647 | 806    | 972     | 3.6    | 7  | 51.9  |                     |      |
| 463 | 460    | 50   | 0.317647 | 806    | 972     | 3.6    | 28 | 70.4  |                     |      |

|     |       |      |          |       |       |         |    |       |          |      |
|-----|-------|------|----------|-------|-------|---------|----|-------|----------|------|
| 464 | 485   | 25   | 0.317647 | 806   | 972   | 3.25    | 7  | 50.9  | cube 150 | [23] |
| 465 | 485   | 25   | 0.317647 | 806   | 972   | 3.25    | 28 | 64.6  |          |      |
| 466 | 510   | 0    | 0.317647 | 806   | 972   | 3       | 28 | 61.9  |          |      |
| 467 | 350   | 35   | 0.42     | 685   | 1200  | 0.55825 | 2  | 44.6  |          |      |
| 468 | 350   | 70   | 0.42     | 650   | 1200  | 0.8694  | 2  | 45.4  |          |      |
| 469 | 350   | 35   | 0.42     | 685   | 1200  | 0.8547  | 2  | 46.6  |          |      |
| 470 | 350   | 70   | 0.42     | 650   | 1200  | 1.4994  | 2  | 49.7  |          |      |
| 471 | 350   | 35   | 0.42     | 685   | 1200  | 0.55825 | 7  | 73    |          |      |
| 472 | 350   | 70   | 0.42     | 650   | 1200  | 0.8694  | 7  | 67.1  |          |      |
| 473 | 350   | 35   | 0.42     | 685   | 1200  | 0.8547  | 7  | 63.3  |          |      |
| 474 | 350   | 70   | 0.42     | 650   | 1200  | 1.4994  | 7  | 69.7  |          |      |
| 475 | 350   | 35   | 0.42     | 685   | 1200  | 0.55825 | 28 | 91.6  |          |      |
| 476 | 350   | 70   | 0.42     | 650   | 1200  | 0.8694  | 28 | 81.5  |          |      |
| 477 | 350   | 35   | 0.42     | 685   | 1200  | 0.8547  | 28 | 81.4  |          |      |
| 478 | 350   | 70   | 0.42     | 650   | 1200  | 1.4994  | 28 | 83.7  |          |      |
| 479 | 350   | 35   | 0.42     | 685   | 1200  | 0.55825 | 90 | 91    |          |      |
| 480 | 350   | 70   | 0.42     | 650   | 1200  | 0.8694  | 90 | 82.9  |          |      |
| 481 | 350   | 35   | 0.42     | 685   | 1200  | 0.8547  | 90 | 90.9  |          |      |
| 482 | 350   | 70   | 0.42     | 650   | 1200  | 1.4994  | 90 | 94.8  |          |      |
| 483 | 450   | 0    | 0.26     | 904   | 904   | 5.4     | 3  | 48.4  | cube 150 | [24] |
| 484 | 384.5 | 67.5 | 0.26     | 904   | 904   | 7.232   | 3  | 49.9  |          |      |
| 485 | 384.5 | 67.5 | 0.26     | 904   | 904   | 7.232   | 7  | 72.5  |          |      |
| 486 | 384.5 | 67.5 | 0.26     | 904   | 904   | 7.232   | 28 | 88.3  |          |      |
| 487 | 405   | 45   | 0.26     | 904   | 904   | 6.3     | 3  | 48.5  |          |      |
| 488 | 405   | 45   | 0.26     | 904   | 904   | 6.3     | 7  | 69.3  |          |      |
| 489 | 405   | 45   | 0.26     | 904   | 904   | 6.3     | 28 | 83.7  |          |      |
| 490 | 427.5 | 22.5 | 0.26     | 904   | 904   | 5.4     | 3  | 49.8  |          |      |
| 491 | 427.5 | 22.5 | 0.26     | 904   | 904   | 5.4     | 7  | 65.8  |          |      |
| 492 | 427.5 | 22.5 | 0.26     | 904   | 904   | 5.4     | 28 | 80.6  |          |      |
| 493 | 450   | 0    | 0.26     | 904   | 904   | 5.4     | 7  | 59    |          |      |
| 494 | 450   | 0    | 0.26     | 904   | 904   | 5.4     | 28 | 73.7  |          |      |
| 495 | 550   | 0    | 0.25     | 579.5 | 177.9 | 4.23    | 3  | 67    | cube 150 | [25] |
| 496 | 399.5 | 70.5 | 0.35     | 571.2 | 175.4 | 4.31    | 3  | 51.1  |          |      |
| 497 | 399.5 | 70.5 | 0.35     | 571.2 | 175.4 | 4.31    | 7  | 65    |          |      |
| 498 | 399.5 | 70.5 | 0.35     | 571.2 | 175.4 | 4.31    | 28 | 73    |          |      |
| 499 | 446.5 | 23.5 | 0.35     | 576.5 | 177   | 3       | 3  | 47.5  |          |      |
| 500 | 446.5 | 23.5 | 0.35     | 576.5 | 177   | 3       | 7  | 58.4  |          |      |
| 501 | 446.5 | 23.5 | 0.35     | 576.5 | 177   | 3       | 28 | 66.4  |          |      |
| 502 | 467.5 | 82.5 | 0.25     | 570.3 | 175.1 | 8.4     | 3  | 64.8  |          |      |
| 503 | 467.5 | 82.5 | 0.25     | 570.3 | 175.1 | 8.4     | 7  | 79.25 |          |      |
| 504 | 467.5 | 82.5 | 0.25     | 570.3 | 175.1 | 8.4     | 28 | 83    |          |      |
| 505 | 470   | 0    | 0.35     | 579.1 | 177.8 | 1.86    | 3  | 45.8  |          |      |
| 506 | 470   | 0    | 0.35     | 579.1 | 177.8 | 1.86    | 7  | 52    |          |      |

|     |        |       |      |       |       |          |     |       |          |      |
|-----|--------|-------|------|-------|-------|----------|-----|-------|----------|------|
| 507 | 470    | 0     | 0.35 | 579.1 | 177.8 | 1.86     | 28  | 61.5  |          |      |
| 508 | 522.5  | 27.5  | 0.25 | 576.4 | 177   | 5.4      | 3   | 67.5  |          |      |
| 509 | 522.5  | 27.5  | 0.25 | 576.4 | 177   | 5.4      | 7   | 72.5  |          |      |
| 510 | 522.5  | 27.5  | 0.25 | 576.4 | 177   | 5.4      | 28  | 78.5  |          |      |
| 511 | 550    | 0     | 0.25 | 579.5 | 177.9 | 4.23     | 7   | 68    |          |      |
| 512 | 550    | 0     | 0.25 | 579.5 | 177.9 | 4.23     | 28  | 75    |          |      |
| 513 | 380    | 0     | 0.5  | 755   | 685   | 7.6      | 28  | 33.75 |          |      |
| 514 | 266    | 114   | 0.5  | 755   | 685   | 7.6      | 28  | 36.25 |          |      |
| 515 | 266    | 114   | 0.5  | 755   | 685   | 7.6      | 90  | 38.55 |          |      |
| 516 | 285    | 95    | 0.5  | 755   | 685   | 7.6      | 28  | 38.25 |          |      |
| 517 | 285    | 95    | 0.5  | 755   | 685   | 7.6      | 90  | 41.4  | cube 100 | [26] |
| 518 | 304    | 76    | 0.5  | 755   | 685   | 7.6      | 28  | 43.7  |          |      |
| 519 | 304    | 76    | 0.5  | 755   | 685   | 7.6      | 90  | 45.8  |          |      |
| 520 | 323    | 57    | 0.5  | 755   | 685   | 7.6      | 28  | 44.8  |          |      |
| 521 | 323    | 57    | 0.5  | 755   | 685   | 7.6      | 90  | 47    |          |      |
| 522 | 342    | 38    | 0.5  | 755   | 685   | 7.6      | 28  | 39.4  |          |      |
| 523 | 342    | 38    | 0.5  | 755   | 685   | 7.6      | 90  | 43.1  |          |      |
| 524 | 361    | 19    | 0.5  | 755   | 685   | 7.6      | 28  | 36.25 |          |      |
| 525 | 361    | 19    | 0.5  | 755   | 685   | 7.6      | 90  | 38    |          |      |
| 526 | 380    | 0     | 0.5  | 755   | 685   | 7.6      | 90  | 35    |          |      |
| 527 | 500    | 0     | 0.3  | 725   | 1087  | 0.5      | 3   | 68.5  | cube 100 | [27] |
| 528 | 400    | 100   | 0.3  | 708   | 1087  | 1        | 3   | 70.8  |          |      |
| 529 | 400    | 100   | 0.3  | 708   | 1087  | 1        | 7   | 87.6  |          |      |
| 530 | 400    | 100   | 0.3  | 708   | 1087  | 1        | 28  | 99.6  |          |      |
| 531 | 450    | 50    | 0.3  | 717   | 1087  | 0.8      | 3   | 85.9  |          |      |
| 532 | 450    | 50    | 0.3  | 717   | 1087  | 0.8      | 7   | 99.8  |          |      |
| 533 | 475    | 25    | 0.3  | 721   | 1087  | 0.6      | 3   | 73    |          |      |
| 534 | 475    | 25    | 0.3  | 721   | 1087  | 0.6      | 7   | 88.2  |          |      |
| 535 | 475    | 25    | 0.3  | 721   | 1087  | 0.6      | 28  | 103.6 |          |      |
| 536 | 500    | 0     | 0.3  | 725   | 1087  | 0.5      | 7   | 81.1  |          |      |
| 537 | 500    | 0     | 0.3  | 725   | 1087  | 0.5      | 28  | 96.5  | cube 100 | [28] |
| 538 | 500    | 0     | 0.3  | 725   | 1087  | 0.5      | 90  | 102.5 |          |      |
| 539 | 235    | 0     | 0.79 | 700   | 1200  | 0.705    | 1   | 7.5   |          |      |
| 540 | 176.25 | 58.75 | 0.79 | 700   | 1200  | 2.767125 | 1   | 4     |          |      |
| 541 | 176.25 | 58.75 | 0.79 | 700   | 1200  | 2.767125 | 2   | 7.5   |          |      |
| 542 | 176.25 | 58.75 | 0.79 | 700   | 1200  | 2.767125 | 7   | 14    |          |      |
| 543 | 176.25 | 58.75 | 0.79 | 700   | 1200  | 2.767125 | 28  | 29.5  |          |      |
| 544 | 176.25 | 58.75 | 0.79 | 700   | 1200  | 2.767125 | 60  | 33    |          |      |
| 545 | 176.25 | 58.75 | 0.79 | 700   | 1200  | 2.767125 | 180 | 34    |          |      |
| 546 | 188    | 47    | 0.79 | 700   | 1200  | 2.1244   | 1   | 5     |          |      |
| 547 | 188    | 47    | 0.79 | 700   | 1200  | 2.1244   | 2   | 9     |          |      |
| 548 | 188    | 47    | 0.79 | 700   | 1200  | 2.1244   | 7   | 16    |          |      |
| 549 | 188    | 47    | 0.79 | 700   | 1200  | 2.1244   | 28  | 29.5  |          |      |

|     |        |       |      |     |      |          |     |      |  |  |
|-----|--------|-------|------|-----|------|----------|-----|------|--|--|
| 550 | 188    | 47    | 0.79 | 700 | 1200 | 2.1244   | 60  | 33   |  |  |
| 551 | 188    | 47    | 0.79 | 700 | 1200 | 2.1244   | 180 | 34   |  |  |
| 552 | 199.75 | 35.25 | 0.79 | 700 | 1200 | 1.578025 | 1   | 6    |  |  |
| 553 | 199.75 | 35.25 | 0.79 | 700 | 1200 | 1.578025 | 2   | 10.5 |  |  |
| 554 | 199.75 | 35.25 | 0.79 | 700 | 1200 | 1.578025 | 7   | 16.5 |  |  |
| 555 | 199.75 | 35.25 | 0.79 | 700 | 1200 | 1.578025 | 28  | 29   |  |  |
| 556 | 199.75 | 35.25 | 0.79 | 700 | 1200 | 1.578025 | 60  | 32.5 |  |  |
| 557 | 199.75 | 35.25 | 0.79 | 700 | 1200 | 1.578025 | 180 | 34   |  |  |
| 558 | 211.5  | 23.5  | 0.79 | 700 | 1200 | 1.33245  | 1   | 6.5  |  |  |
| 559 | 211.5  | 23.5  | 0.79 | 700 | 1200 | 1.33245  | 2   | 11.5 |  |  |
| 560 | 211.5  | 23.5  | 0.79 | 700 | 1200 | 1.33245  | 7   | 18   |  |  |
| 561 | 211.5  | 23.5  | 0.79 | 700 | 1200 | 1.33245  | 28  | 28.5 |  |  |
| 562 | 211.5  | 23.5  | 0.79 | 700 | 1200 | 1.33245  | 60  | 32   |  |  |
| 563 | 211.5  | 23.5  | 0.79 | 700 | 1200 | 1.33245  | 180 | 34   |  |  |
| 564 | 213.75 | 71.25 | 0.65 | 730 | 1200 | 3.29175  | 1   | 7.5  |  |  |
| 565 | 213.75 | 71.25 | 0.65 | 730 | 1200 | 3.29175  | 2   | 13   |  |  |
| 566 | 213.75 | 71.25 | 0.65 | 730 | 1200 | 3.29175  | 7   | 26.5 |  |  |
| 567 | 213.75 | 71.25 | 0.65 | 730 | 1200 | 3.29175  | 28  | 44   |  |  |
| 568 | 213.75 | 71.25 | 0.65 | 730 | 1200 | 3.29175  | 60  | 47.5 |  |  |
| 569 | 213.75 | 71.25 | 0.65 | 730 | 1200 | 3.29175  | 180 | 49.5 |  |  |
| 570 | 223.25 | 11.75 | 0.79 | 700 | 1200 | 0.9823   | 1   | 7    |  |  |
| 571 | 223.25 | 11.75 | 0.79 | 700 | 1200 | 0.9823   | 2   | 11.5 |  |  |
| 572 | 223.25 | 11.75 | 0.79 | 700 | 1200 | 0.9823   | 7   | 18.5 |  |  |
| 573 | 223.25 | 11.75 | 0.79 | 700 | 1200 | 0.9823   | 28  | 28   |  |  |
| 574 | 223.25 | 11.75 | 0.79 | 700 | 1200 | 0.9823   | 60  | 31.5 |  |  |
| 575 | 223.25 | 11.75 | 0.79 | 700 | 1200 | 0.9823   | 180 | 34.5 |  |  |
| 576 | 228    | 57    | 0.65 | 730 | 1200 | 2.622    | 1   | 9    |  |  |
| 577 | 228    | 57    | 0.65 | 730 | 1200 | 2.622    | 2   | 15   |  |  |
| 578 | 228    | 57    | 0.65 | 730 | 1200 | 2.622    | 7   | 26   |  |  |
| 579 | 228    | 57    | 0.65 | 730 | 1200 | 2.622    | 28  | 44   |  |  |
| 580 | 228    | 57    | 0.65 | 730 | 1200 | 2.622    | 60  | 47.5 |  |  |
| 581 | 228    | 57    | 0.65 | 730 | 1200 | 2.622    | 180 | 49.5 |  |  |
| 582 | 232.5  | 77.5  | 0.6  | 710 | 1200 | 3.0225   | 1   | 10   |  |  |
| 583 | 232.5  | 77.5  | 0.6  | 710 | 1200 | 3.0225   | 2   | 16.5 |  |  |
| 584 | 232.5  | 77.5  | 0.6  | 710 | 1200 | 3.0225   | 7   | 31   |  |  |
| 585 | 232.5  | 77.5  | 0.6  | 710 | 1200 | 3.0225   | 28  | 50.5 |  |  |
| 586 | 232.5  | 77.5  | 0.6  | 710 | 1200 | 3.0225   | 60  | 54   |  |  |
| 587 | 232.5  | 77.5  | 0.6  | 710 | 1200 | 3.0225   | 180 | 55   |  |  |
| 588 | 235    | 0     | 0.79 | 700 | 1200 | 0.705    | 2   | 12   |  |  |
| 589 | 235    | 0     | 0.79 | 700 | 1200 | 0.705    | 7   | 18.5 |  |  |
| 590 | 235    | 0     | 0.79 | 700 | 1200 | 0.705    | 28  | 27.5 |  |  |
| 591 | 235    | 0     | 0.79 | 700 | 1200 | 0.705    | 60  | 31   |  |  |
| 592 | 235    | 0     | 0.79 | 700 | 1200 | 0.705    | 180 | 34   |  |  |

|     |        |       |      |     |      |          |     |      |  |  |
|-----|--------|-------|------|-----|------|----------|-----|------|--|--|
| 593 | 242.25 | 42.75 | 0.65 | 730 | 1200 | 1.865325 | 1   | 9.5  |  |  |
| 594 | 242.25 | 42.75 | 0.65 | 730 | 1200 | 1.865325 | 2   | 16.5 |  |  |
| 595 | 242.25 | 42.75 | 0.65 | 730 | 1200 | 1.865325 | 7   | 26.5 |  |  |
| 596 | 242.25 | 42.75 | 0.65 | 730 | 1200 | 1.865325 | 28  | 43   |  |  |
| 597 | 242.25 | 42.75 | 0.65 | 730 | 1200 | 1.865325 | 60  | 46.5 |  |  |
| 598 | 242.25 | 42.75 | 0.65 | 730 | 1200 | 1.865325 | 180 | 49   |  |  |
| 599 | 248    | 62    | 0.6  | 710 | 1200 | 2.5792   | 1   | 10.5 |  |  |
| 600 | 248    | 62    | 0.6  | 710 | 1200 | 2.5792   | 2   | 17.5 |  |  |
| 601 | 248    | 62    | 0.6  | 710 | 1200 | 2.5792   | 7   | 31.5 |  |  |
| 602 | 248    | 62    | 0.6  | 710 | 1200 | 2.5792   | 28  | 50.5 |  |  |
| 603 | 248    | 62    | 0.6  | 710 | 1200 | 2.5792   | 60  | 54   |  |  |
| 604 | 248    | 62    | 0.6  | 710 | 1200 | 2.5792   | 180 | 55   |  |  |
| 605 | 256.5  | 28.5  | 0.65 | 730 | 1200 | 1.4877   | 1   | 10   |  |  |
| 606 | 256.5  | 28.5  | 0.65 | 730 | 1200 | 1.4877   | 2   | 17   |  |  |
| 607 | 256.5  | 28.5  | 0.65 | 730 | 1200 | 1.4877   | 7   | 26.5 |  |  |
| 608 | 256.5  | 28.5  | 0.65 | 730 | 1200 | 1.4877   | 28  | 41.5 |  |  |
| 609 | 256.5  | 28.5  | 0.65 | 730 | 1200 | 1.4877   | 60  | 45.5 |  |  |
| 610 | 256.5  | 28.5  | 0.65 | 730 | 1200 | 1.4877   | 180 | 48   |  |  |
| 611 | 263.5  | 46.5  | 0.6  | 710 | 1200 | 1.81815  | 1   | 11   |  |  |
| 612 | 263.5  | 46.5  | 0.6  | 710 | 1200 | 1.81815  | 2   | 19   |  |  |
| 613 | 263.5  | 46.5  | 0.6  | 710 | 1200 | 1.81815  | 7   | 31.5 |  |  |
| 614 | 263.5  | 46.5  | 0.6  | 710 | 1200 | 1.81815  | 28  | 49   |  |  |
| 615 | 263.5  | 46.5  | 0.6  | 710 | 1200 | 1.81815  | 60  | 53   |  |  |
| 616 | 263.5  | 46.5  | 0.6  | 710 | 1200 | 1.81815  | 180 | 54.5 |  |  |
| 617 | 266.25 | 88.75 | 0.52 | 670 | 1200 | 3.860625 | 1   | 13   |  |  |
| 618 | 266.25 | 88.75 | 0.52 | 670 | 1200 | 3.860625 | 2   | 24.5 |  |  |
| 619 | 266.25 | 88.75 | 0.52 | 670 | 1200 | 3.860625 | 7   | 42.5 |  |  |
| 620 | 266.25 | 88.75 | 0.52 | 670 | 1200 | 3.860625 | 28  | 62   |  |  |
| 621 | 266.25 | 88.75 | 0.52 | 670 | 1200 | 3.860625 | 60  | 66   |  |  |
| 622 | 266.25 | 88.75 | 0.52 | 670 | 1200 | 3.860625 | 180 | 68   |  |  |
| 623 | 270.75 | 14.25 | 0.65 | 730 | 1200 | 1.02885  | 1   | 10   |  |  |
| 624 | 270.75 | 14.25 | 0.65 | 730 | 1200 | 1.02885  | 2   | 17   |  |  |
| 625 | 270.75 | 14.25 | 0.65 | 730 | 1200 | 1.02885  | 7   | 26.5 |  |  |
| 626 | 270.75 | 14.25 | 0.65 | 730 | 1200 | 1.02885  | 28  | 40   |  |  |
| 627 | 270.75 | 14.25 | 0.65 | 730 | 1200 | 1.02885  | 60  | 44   |  |  |
| 628 | 270.75 | 14.25 | 0.65 | 730 | 1200 | 1.02885  | 180 | 47   |  |  |
| 629 | 279    | 31    | 0.6  | 710 | 1200 | 1.1997   | 1   | 11.5 |  |  |
| 630 | 279    | 31    | 0.6  | 710 | 1200 | 1.1997   | 2   | 19.5 |  |  |
| 631 | 279    | 31    | 0.6  | 710 | 1200 | 1.1997   | 7   | 31   |  |  |
| 632 | 279    | 31    | 0.6  | 710 | 1200 | 1.1997   | 28  | 47   |  |  |
| 633 | 279    | 31    | 0.6  | 710 | 1200 | 1.1997   | 60  | 51   |  |  |
| 634 | 279    | 31    | 0.6  | 710 | 1200 | 1.1997   | 180 | 53.5 |  |  |
| 635 | 284    | 71    | 0.52 | 670 | 1200 | 3.266    | 1   | 14   |  |  |

|     |        |       |      |     |      |         |     |      |  |  |
|-----|--------|-------|------|-----|------|---------|-----|------|--|--|
| 636 | 284    | 71    | 0.52 | 670 | 1200 | 3.266   | 2   | 25   |  |  |
| 637 | 284    | 71    | 0.52 | 670 | 1200 | 3.266   | 7   | 42.5 |  |  |
| 638 | 284    | 71    | 0.52 | 670 | 1200 | 3.266   | 28  | 61.5 |  |  |
| 639 | 284    | 71    | 0.52 | 670 | 1200 | 3.266   | 60  | 65.5 |  |  |
| 640 | 284    | 71    | 0.52 | 670 | 1200 | 3.266   | 180 | 67.5 |  |  |
| 641 | 285    | 0     | 0.65 | 730 | 1200 | 0.684   | 1   | 10.5 |  |  |
| 642 | 285    | 0     | 0.65 | 730 | 1200 | 0.684   | 2   | 17.5 |  |  |
| 643 | 285    | 0     | 0.65 | 730 | 1200 | 0.684   | 7   | 26.5 |  |  |
| 644 | 285    | 0     | 0.65 | 730 | 1200 | 0.684   | 28  | 37   |  |  |
| 645 | 285    | 0     | 0.65 | 730 | 1200 | 0.684   | 60  | 41   |  |  |
| 646 | 285    | 0     | 0.65 | 730 | 1200 | 0.684   | 180 | 44.5 |  |  |
| 647 | 294.5  | 15.5  | 0.6  | 710 | 1200 | 0.7657  | 1   | 12   |  |  |
| 648 | 294.5  | 15.5  | 0.6  | 710 | 1200 | 0.7657  | 2   | 20   |  |  |
| 649 | 294.5  | 15.5  | 0.6  | 710 | 1200 | 0.7657  | 7   | 31   |  |  |
| 650 | 294.5  | 15.5  | 0.6  | 710 | 1200 | 0.7657  | 28  | 44.5 |  |  |
| 651 | 294.5  | 15.5  | 0.6  | 710 | 1200 | 0.7657  | 60  | 48.5 |  |  |
| 652 | 294.5  | 15.5  | 0.6  | 710 | 1200 | 0.7657  | 180 | 52   |  |  |
| 653 | 301.75 | 53.25 | 0.52 | 670 | 1200 | 2.414   | 1   | 15   |  |  |
| 654 | 301.75 | 53.25 | 0.52 | 670 | 1200 | 2.414   | 2   | 25.5 |  |  |
| 655 | 301.75 | 53.25 | 0.52 | 670 | 1200 | 2.414   | 7   | 41.5 |  |  |
| 656 | 301.75 | 53.25 | 0.52 | 670 | 1200 | 2.414   | 28  | 60   |  |  |
| 657 | 301.75 | 53.25 | 0.52 | 670 | 1200 | 2.414   | 60  | 64.5 |  |  |
| 658 | 301.75 | 53.25 | 0.52 | 670 | 1200 | 2.414   | 180 | 67   |  |  |
| 659 | 307.5  | 102.5 | 0.45 | 625 | 1200 | 4.76625 | 1   | 19   |  |  |
| 660 | 307.5  | 102.5 | 0.45 | 625 | 1200 | 4.76625 | 2   | 31   |  |  |
| 661 | 307.5  | 102.5 | 0.45 | 625 | 1200 | 4.76625 | 7   | 53.5 |  |  |
| 662 | 307.5  | 102.5 | 0.45 | 625 | 1200 | 4.76625 | 28  | 73   |  |  |
| 663 | 307.5  | 102.5 | 0.45 | 625 | 1200 | 4.76625 | 60  | 78   |  |  |
| 664 | 307.5  | 102.5 | 0.45 | 625 | 1200 | 4.76625 | 180 | 79   |  |  |
| 665 | 310    | 0     | 0.6  | 710 | 1200 | 0.403   | 1   | 12   |  |  |
| 666 | 310    | 0     | 0.6  | 710 | 1200 | 0.403   | 2   | 20   |  |  |
| 667 | 310    | 0     | 0.6  | 710 | 1200 | 0.403   | 7   | 30.5 |  |  |
| 668 | 310    | 0     | 0.6  | 710 | 1200 | 0.403   | 28  | 41   |  |  |
| 669 | 310    | 0     | 0.6  | 710 | 1200 | 0.403   | 60  | 45   |  |  |
| 670 | 310    | 0     | 0.6  | 710 | 1200 | 0.403   | 180 | 49   |  |  |
| 671 | 319.5  | 35.5  | 0.52 | 670 | 1200 | 1.5975  | 1   | 15.5 |  |  |
| 672 | 319.5  | 35.5  | 0.52 | 670 | 1200 | 1.5975  | 2   | 26   |  |  |
| 673 | 319.5  | 35.5  | 0.52 | 670 | 1200 | 1.5975  | 7   | 40.5 |  |  |
| 674 | 319.5  | 35.5  | 0.52 | 670 | 1200 | 1.5975  | 28  | 57   |  |  |
| 675 | 319.5  | 35.5  | 0.52 | 670 | 1200 | 1.5975  | 60  | 61   |  |  |
| 676 | 319.5  | 35.5  | 0.52 | 670 | 1200 | 1.5975  | 180 | 63.5 |  |  |
| 677 | 328    | 82    | 0.45 | 625 | 1200 | 3.8704  | 1   | 19.5 |  |  |
| 678 | 328    | 82    | 0.45 | 625 | 1200 | 3.8704  | 2   | 32.5 |  |  |

|     |        |       |      |     |      |          |     |      |          |      |
|-----|--------|-------|------|-----|------|----------|-----|------|----------|------|
| 679 | 328    | 82    | 0.45 | 625 | 1200 | 3.8704   | 7   | 53.5 |          |      |
| 680 | 328    | 82    | 0.45 | 625 | 1200 | 3.8704   | 28  | 72.5 |          |      |
| 681 | 328    | 82    | 0.45 | 625 | 1200 | 3.8704   | 60  | 77.5 |          |      |
| 682 | 328    | 82    | 0.45 | 625 | 1200 | 3.8704   | 180 | 78.5 |          |      |
| 683 | 337.25 | 17.75 | 0.52 | 670 | 1200 | 1.315275 | 1   | 16   |          |      |
| 684 | 337.25 | 17.75 | 0.52 | 670 | 1200 | 1.315275 | 2   | 27   |          |      |
| 685 | 337.25 | 17.75 | 0.52 | 670 | 1200 | 1.315275 | 7   | 40   |          |      |
| 686 | 337.25 | 17.75 | 0.52 | 670 | 1200 | 1.315275 | 28  | 55   |          |      |
| 687 | 337.25 | 17.75 | 0.52 | 670 | 1200 | 1.315275 | 60  | 59.5 |          |      |
| 688 | 337.25 | 17.75 | 0.52 | 670 | 1200 | 1.315275 | 180 | 63   |          |      |
| 689 | 348.5  | 61.5  | 0.45 | 625 | 1200 | 2.9274   | 1   | 20   |          |      |
| 690 | 348.5  | 61.5  | 0.45 | 625 | 1200 | 2.9274   | 2   | 33   |          |      |
| 691 | 348.5  | 61.5  | 0.45 | 625 | 1200 | 2.9274   | 7   | 53.5 |          |      |
| 692 | 348.5  | 61.5  | 0.45 | 625 | 1200 | 2.9274   | 28  | 71   |          |      |
| 693 | 348.5  | 61.5  | 0.45 | 625 | 1200 | 2.9274   | 60  | 75.5 |          |      |
| 694 | 348.5  | 61.5  | 0.45 | 625 | 1200 | 2.9274   | 180 | 78   |          |      |
| 695 | 355    | 0     | 0.52 | 670 | 1200 | 0.3905   | 1   | 16   |          |      |
| 696 | 355    | 0     | 0.52 | 670 | 1200 | 0.3905   | 2   | 26   |          |      |
| 697 | 355    | 0     | 0.52 | 670 | 1200 | 0.3905   | 7   | 38.5 |          |      |
| 698 | 355    | 0     | 0.52 | 670 | 1200 | 0.3905   | 28  | 50   |          |      |
| 699 | 355    | 0     | 0.52 | 670 | 1200 | 0.3905   | 60  | 54   |          |      |
| 700 | 355    | 0     | 0.52 | 670 | 1200 | 0.3905   | 180 | 58   |          |      |
| 701 | 369    | 41    | 0.45 | 625 | 1200 | 2.4723   | 1   | 20.5 |          |      |
| 702 | 369    | 41    | 0.45 | 625 | 1200 | 2.4723   | 2   | 33.5 |          |      |
| 703 | 369    | 41    | 0.45 | 625 | 1200 | 2.4723   | 7   | 50   |          |      |
| 704 | 369    | 41    | 0.45 | 625 | 1200 | 2.4723   | 28  | 66.5 |          |      |
| 705 | 369    | 41    | 0.45 | 625 | 1200 | 2.4723   | 60  | 71.5 |          |      |
| 706 | 369    | 41    | 0.45 | 625 | 1200 | 2.4723   | 180 | 73.5 |          |      |
| 707 | 389.5  | 20.5  | 0.45 | 625 | 1200 | 1.6359   | 1   | 20.5 |          |      |
| 708 | 389.5  | 20.5  | 0.45 | 625 | 1200 | 1.6359   | 2   | 33   |          |      |
| 709 | 389.5  | 20.5  | 0.45 | 625 | 1200 | 1.6359   | 7   | 49   |          |      |
| 710 | 389.5  | 20.5  | 0.45 | 625 | 1200 | 1.6359   | 28  | 64   |          |      |
| 711 | 389.5  | 20.5  | 0.45 | 625 | 1200 | 1.6359   | 60  | 68.5 |          |      |
| 712 | 389.5  | 20.5  | 0.45 | 625 | 1200 | 1.6359   | 180 | 72   |          |      |
| 713 | 410    | 0     | 0.45 | 625 | 1200 | 0.861    | 1   | 20.5 |          |      |
| 714 | 410    | 0     | 0.45 | 625 | 1200 | 0.861    | 2   | 32   |          |      |
| 715 | 410    | 0     | 0.45 | 625 | 1200 | 0.861    | 7   | 47.5 |          |      |
| 716 | 410    | 0     | 0.45 | 625 | 1200 | 0.861    | 28  | 59   |          |      |
| 717 | 410    | 0     | 0.45 | 625 | 1200 | 0.861    | 60  | 63.5 |          |      |
| 718 | 410    | 0     | 0.45 | 625 | 1200 | 0.861    | 180 | 68   |          |      |
| 719 | 330    | 0     | 0.6  | 710 | 1240 | 0        | 7   | 18.9 | cube 150 | [29] |
| 720 | 297    | 33    | 0.6  | 710 | 1240 | 0        | 7   | 17   |          |      |
| 721 | 280.5  | 49.5  | 0.6  | 710 | 1240 | 0        | 7   | 14.9 |          |      |

|     |       |      |      |     |      |   |     |      |  |  |
|-----|-------|------|------|-----|------|---|-----|------|--|--|
| 722 | 264   | 66   | 0.6  | 710 | 1240 | 0 | 7   | 12.4 |  |  |
| 723 | 440   | 0    | 0.45 | 600 | 1240 | 0 | 7   | 30.5 |  |  |
| 724 | 396   | 44   | 0.45 | 600 | 1240 | 0 | 7   | 30.2 |  |  |
| 725 | 374   | 66   | 0.45 | 600 | 1240 | 0 | 7   | 32.7 |  |  |
| 726 | 352   | 88   | 0.45 | 600 | 1240 | 0 | 7   | 24.7 |  |  |
| 727 | 440   | 0    | 0.45 | 600 | 1240 | 0 | 7   | 22.4 |  |  |
| 728 | 396   | 44   | 0.45 | 600 | 1240 | 0 | 7   | 24.5 |  |  |
| 729 | 374   | 66   | 0.45 | 600 | 1240 | 0 | 7   | 20.6 |  |  |
| 730 | 330   | 0    | 0.6  | 710 | 1240 | 0 | 14  | 22.2 |  |  |
| 731 | 297   | 33   | 0.6  | 710 | 1240 | 0 | 14  | 22.2 |  |  |
| 732 | 280.5 | 49.5 | 0.6  | 710 | 1240 | 0 | 14  | 21   |  |  |
| 733 | 264   | 66   | 0.6  | 710 | 1240 | 0 | 14  | 18.8 |  |  |
| 734 | 440   | 0    | 0.45 | 600 | 1240 | 0 | 14  | 33.7 |  |  |
| 735 | 396   | 44   | 0.45 | 600 | 1240 | 0 | 14  | 35.9 |  |  |
| 736 | 374   | 66   | 0.45 | 600 | 1240 | 0 | 14  | 40.4 |  |  |
| 737 | 352   | 88   | 0.45 | 600 | 1240 | 0 | 14  | 32.1 |  |  |
| 738 | 440   | 0    | 0.45 | 600 | 1240 | 0 | 14  | 27.1 |  |  |
| 739 | 396   | 44   | 0.45 | 600 | 1240 | 0 | 14  | 32.6 |  |  |
| 740 | 374   | 66   | 0.45 | 600 | 1240 | 0 | 14  | 30.5 |  |  |
| 741 | 330   | 0    | 0.6  | 710 | 1240 | 0 | 28  | 23.9 |  |  |
| 742 | 297   | 33   | 0.6  | 710 | 1240 | 0 | 28  | 26.6 |  |  |
| 743 | 280.5 | 49.5 | 0.6  | 710 | 1240 | 0 | 28  | 25   |  |  |
| 744 | 264   | 66   | 0.6  | 710 | 1240 | 0 | 28  | 23.4 |  |  |
| 745 | 440   | 0    | 0.45 | 600 | 1240 | 0 | 28  | 40.6 |  |  |
| 746 | 396   | 44   | 0.45 | 600 | 1240 | 0 | 28  | 40.9 |  |  |
| 747 | 374   | 66   | 0.45 | 600 | 1240 | 0 | 28  | 48   |  |  |
| 748 | 352   | 88   | 0.45 | 600 | 1240 | 0 | 28  | 39.7 |  |  |
| 749 | 440   | 0    | 0.45 | 600 | 1240 | 0 | 28  | 29.7 |  |  |
| 750 | 396   | 44   | 0.45 | 600 | 1240 | 0 | 28  | 37.9 |  |  |
| 751 | 374   | 66   | 0.45 | 600 | 1240 | 0 | 28  | 36.4 |  |  |
| 752 | 330   | 0    | 0.6  | 710 | 1240 | 0 | 90  | 28.1 |  |  |
| 753 | 297   | 33   | 0.6  | 710 | 1240 | 0 | 90  | 31.1 |  |  |
| 754 | 280.5 | 49.5 | 0.6  | 710 | 1240 | 0 | 90  | 31.5 |  |  |
| 755 | 264   | 66   | 0.6  | 710 | 1240 | 0 | 90  | 29.6 |  |  |
| 756 | 440   | 0    | 0.45 | 600 | 1240 | 0 | 90  | 44   |  |  |
| 757 | 396   | 44   | 0.45 | 600 | 1240 | 0 | 90  | 44.8 |  |  |
| 758 | 374   | 66   | 0.45 | 600 | 1240 | 0 | 90  | 53.7 |  |  |
| 759 | 352   | 88   | 0.45 | 600 | 1240 | 0 | 90  | 46.8 |  |  |
| 760 | 440   | 0    | 0.45 | 600 | 1240 | 0 | 90  | 38.5 |  |  |
| 761 | 396   | 44   | 0.45 | 600 | 1240 | 0 | 90  | 45.6 |  |  |
| 762 | 374   | 66   | 0.45 | 600 | 1240 | 0 | 90  | 43.5 |  |  |
| 763 | 330   | 0    | 0.6  | 710 | 1240 | 0 | 180 | 29.1 |  |  |
| 764 | 297   | 33   | 0.6  | 710 | 1240 | 0 | 180 | 31.8 |  |  |
| 765 | 280.5 | 49.5 | 0.6  | 710 | 1240 | 0 | 180 | 33.1 |  |  |

|     |       |      |      |     |      |       |     |        |                     |      |
|-----|-------|------|------|-----|------|-------|-----|--------|---------------------|------|
| 766 | 264   | 66   | 0.6  | 710 | 1240 | 0     | 180 | 33.6   |                     |      |
| 767 | 440   | 0    | 0.45 | 600 | 1240 | 0     | 180 | 44.8   |                     |      |
| 768 | 396   | 44   | 0.45 | 600 | 1240 | 0     | 180 | 45.4   |                     |      |
| 769 | 374   | 66   | 0.45 | 600 | 1240 | 0     | 180 | 54.6   |                     |      |
| 770 | 352   | 88   | 0.45 | 600 | 1240 | 0     | 180 | 47.6   |                     |      |
| 771 | 440   | 0    | 0.45 | 600 | 1240 | 0     | 180 | 43.3   |                     |      |
| 772 | 396   | 44   | 0.45 | 600 | 1240 | 0     | 180 | 48     |                     |      |
| 773 | 374   | 66   | 0.45 | 600 | 1240 | 0     | 180 | 50.3   |                     |      |
| 774 | 450   | 0    | 0.4  | 670 | 1100 | 1.125 | 7   | 67.42  | cube 100            | [30] |
| 775 | 427.5 | 22.5 | 0.4  | 670 | 1100 | 2.25  | 7   | 73.25  |                     |      |
| 776 | 405   | 45   | 0.4  | 670 | 1100 | 3.375 | 7   | 78.43  |                     |      |
| 777 | 382.5 | 67.5 | 0.4  | 670 | 1100 | 4.5   | 7   | 86.7   |                     |      |
| 778 | 360   | 90   | 0.4  | 670 | 1100 | 4.5   | 7   | 84.78  |                     |      |
| 779 | 450   | 0    | 0.4  | 670 | 1100 | 1.125 | 28  | 84.89  |                     |      |
| 780 | 427.5 | 22.5 | 0.4  | 670 | 1100 | 2.25  | 28  | 89.05  |                     |      |
| 781 | 405   | 45   | 0.4  | 670 | 1100 | 3.375 | 28  | 98.86  |                     |      |
| 782 | 382.5 | 67.5 | 0.4  | 670 | 1100 | 4.5   | 28  | 99.74  |                     |      |
| 783 | 360   | 90   | 0.4  | 670 | 1100 | 4.5   | 28  | 94.5   |                     |      |
| 784 | 450   | 0    | 0.4  | 670 | 1100 | 1.125 | 56  | 91.16  |                     |      |
| 785 | 427.5 | 22.5 | 0.4  | 670 | 1100 | 2.25  | 56  | 96.23  |                     |      |
| 786 | 405   | 45   | 0.4  | 670 | 1100 | 3.375 | 56  | 100.6  |                     |      |
| 787 | 382.5 | 67.5 | 0.4  | 670 | 1100 | 4.5   | 56  | 100.54 |                     |      |
| 788 | 360   | 90   | 0.4  | 670 | 1100 | 4.5   | 56  | 96.84  |                     |      |
| 789 | 450   | 0    | 0.4  | 670 | 1100 | 1.125 | 90  | 92.28  |                     |      |
| 790 | 427.5 | 22.5 | 0.4  | 670 | 1100 | 2.25  | 90  | 97.12  |                     |      |
| 791 | 405   | 45   | 0.4  | 670 | 1100 | 3.375 | 90  | 101.15 |                     |      |
| 792 | 382.5 | 67.5 | 0.4  | 670 | 1100 | 4.5   | 90  | 103.67 |                     |      |
| 793 | 360   | 90   | 0.4  | 670 | 1100 | 4.5   | 90  | 100.87 |                     |      |
| 794 | 372   | 0    | 0.5  | 698 | 1238 | 0     | 28  | 31.9   | cube 150            | [31] |
| 795 | 352.4 | 18.6 | 0.5  | 698 | 1238 | 0     | 28  | 35.84  |                     |      |
| 796 | 334.8 | 37.2 | 0.5  | 698 | 1238 | 0     | 28  | 38.81  |                     |      |
| 797 | 316.2 | 55.8 | 0.5  | 698 | 1238 | 0     | 28  | 32.58  |                     |      |
| 798 | 297.6 | 74.4 | 0.5  | 698 | 1238 | 0     | 28  | 32     |                     |      |
| 799 | 400   | 0    | 0.55 | 880 | 800  | 8     | 28  | 40.7   | cube 100            | [32] |
| 800 | 380   | 20   | 0.55 | 880 | 800  | 8     | 28  | 48.3   |                     |      |
| 801 | 360   | 40   | 0.55 | 880 | 800  | 8     | 28  | 51.8   |                     |      |
| 802 | 340   | 60   | 0.55 | 880 | 800  | 8     | 28  | 54.5   |                     |      |
| 803 | 320   | 80   | 0.55 | 880 | 800  | 8     | 28  | 57.2   |                     |      |
| 804 | 300   | 100  | 0.55 | 880 | 800  | 8     | 28  | 53.7   |                     |      |
| 805 | 280   | 120  | 0.55 | 880 | 800  | 8     | 28  | 51.5   |                     |      |
| 806 | 589   | 0    | 0.28 | 925 | 808  | 6.61  | 28  | 98.6   | cylinder<br>100*200 | [33] |
| 807 | 547   | 0    | 0.35 | 913 | 798  | 5.86  | 28  | 88.1   |                     |      |
| 808 | 492   | 55   | 0.35 | 915 | 800  | 7.1   | 28  | 98.2   |                     |      |
| 809 | 500   | 0    | 0.38 | 818 | 908  | 4     | 7   | 61     | cube 100            | [34] |

|     |       |      |      |     |      |     |     |       |          |      |
|-----|-------|------|------|-----|------|-----|-----|-------|----------|------|
| 810 | 475   | 25   | 0.38 | 818 | 908  | 4   | 7   | 56    |          |      |
| 811 | 450   | 50   | 0.38 | 818 | 908  | 4.6 | 7   | 57    |          |      |
| 812 | 425   | 75   | 0.38 | 818 | 908  | 4.8 | 7   | 53    |          |      |
| 813 | 500   | 0    | 0.38 | 818 | 908  | 4   | 28  | 68    |          |      |
| 814 | 475   | 25   | 0.38 | 818 | 908  | 4   | 28  | 63    |          |      |
| 815 | 450   | 50   | 0.38 | 818 | 908  | 4.6 | 28  | 66    |          |      |
| 816 | 425   | 75   | 0.38 | 818 | 908  | 4.8 | 28  | 70    |          |      |
| 817 | 500   | 0    | 0.38 | 818 | 908  | 4   | 180 | 79    |          |      |
| 818 | 475   | 25   | 0.38 | 818 | 908  | 4   | 180 | 71    |          |      |
| 819 | 450   | 50   | 0.38 | 818 | 908  | 4.6 | 180 | 72    |          |      |
| 820 | 425   | 75   | 0.38 | 818 | 908  | 4.8 | 180 | 74    | cube 150 | [35] |
| 821 | 600   | 0    | 0.38 | 750 | 600  | 12  | 7   | 21.22 |          |      |
| 822 | 570   | 30   | 0.38 | 750 | 600  | 12  | 7   | 25.23 |          |      |
| 823 | 540   | 60   | 0.38 | 750 | 600  | 12  | 7   | 27.56 |          |      |
| 824 | 510   | 90   | 0.38 | 750 | 600  | 12  | 7   | 32.77 |          |      |
| 825 | 480   | 120  | 0.38 | 750 | 600  | 12  | 7   | 30.45 |          |      |
| 826 | 450   | 150  | 0.38 | 750 | 600  | 12  | 7   | 29.76 |          |      |
| 827 | 600   | 0    | 0.38 | 750 | 600  | 12  | 14  | 25.6  |          |      |
| 828 | 570   | 30   | 0.38 | 750 | 600  | 12  | 14  | 29.11 |          |      |
| 829 | 540   | 60   | 0.38 | 750 | 600  | 12  | 14  | 36.81 |          |      |
| 830 | 510   | 90   | 0.38 | 750 | 600  | 12  | 14  | 39.16 |          |      |
| 831 | 480   | 120  | 0.38 | 750 | 600  | 12  | 14  | 37.3  |          |      |
| 832 | 450   | 150  | 0.38 | 750 | 600  | 12  | 14  | 32.33 |          |      |
| 833 | 600   | 0    | 0.38 | 750 | 600  | 12  | 21  | 32.81 |          |      |
| 834 | 570   | 30   | 0.38 | 750 | 600  | 12  | 21  | 35.06 |          |      |
| 835 | 540   | 60   | 0.38 | 750 | 600  | 12  | 21  | 42.09 |          |      |
| 836 | 510   | 90   | 0.38 | 750 | 600  | 12  | 21  | 45.87 |          |      |
| 837 | 480   | 120  | 0.38 | 750 | 600  | 12  | 21  | 44.6  |          |      |
| 838 | 450   | 150  | 0.38 | 750 | 600  | 12  | 21  | 41.11 |          |      |
| 839 | 600   | 0    | 0.38 | 750 | 600  | 12  | 28  | 39.15 |          |      |
| 840 | 570   | 30   | 0.38 | 750 | 600  | 12  | 28  | 40.55 |          |      |
| 841 | 540   | 60   | 0.38 | 750 | 600  | 12  | 28  | 46.79 |          |      |
| 842 | 510   | 90   | 0.38 | 750 | 600  | 12  | 28  | 49.08 |          |      |
| 843 | 480   | 120  | 0.38 | 750 | 600  | 12  | 28  | 47.9  |          |      |
| 844 | 450   | 150  | 0.38 | 750 | 600  | 12  | 28  | 45.75 | cube 100 | [36] |
| 845 | 575   | 0    | 0.3  | 554 | 1190 | 24  | 7   | 88    |          |      |
| 846 | 563.5 | 11.5 | 0.3  | 554 | 1190 | 24  | 7   | 94.9  |          |      |
| 847 | 552   | 23   | 0.3  | 554 | 1190 | 24  | 7   | 94.8  |          |      |
| 848 | 540.5 | 34.5 | 0.3  | 554 | 1190 | 24  | 7   | 93.7  |          |      |
| 849 | 529   | 46   | 0.3  | 554 | 1190 | 24  | 7   | 97.2  |          |      |
| 850 | 517.5 | 57.5 | 0.3  | 554 | 1190 | 24  | 7   | 101.3 |          |      |
| 851 | 506   | 69   | 0.3  | 554 | 1190 | 24  | 7   | 95.5  |          |      |
| 852 | 494.5 | 80.5 | 0.3  | 554 | 1190 | 24  | 7   | 97.1  |          |      |
| 853 | 483   | 92   | 0.3  | 554 | 1190 | 24  | 7   | 97.4  |          |      |

|     |        |        |      |        |        |       |    |      |                     |      |
|-----|--------|--------|------|--------|--------|-------|----|------|---------------------|------|
| 854 | 460    | 115    | 0.3  | 554    | 1190   | 24    | 7  | 94.1 | cylinder<br>100*200 | [37] |
| 855 | 431.25 | 143.75 | 0.3  | 554    | 1190   | 24    | 7  | 95.7 |                     |      |
| 856 | 575    | 0      | 0.3  | 554    | 1190   | 24    | 28 | 104  |                     |      |
| 857 | 336.42 | 83.58  | 0.37 | 964.94 | 868.45 | 10.43 | 28 | 74.8 |                     |      |
| 858 | 455.52 | 24.48  | 0.37 | 914.42 | 822.98 | 4     | 28 | 74   |                     |      |
| 859 | 393.75 | 56.25  | 0.4  | 920.98 | 828.88 | 4.57  | 28 | 76.5 |                     |      |
| 860 | 393.75 | 56.25  | 0.4  | 920.98 | 828.88 | 4.57  | 28 | 77.8 |                     |      |
| 861 | 384.48 | 95.52  | 0.43 | 867.89 | 781.1  | 4.86  | 28 | 72.5 |                     |      |
| 862 | 393.75 | 56.25  | 0.45 | 890.19 | 801.18 | 3.29  | 28 | 67.3 |                     |      |
| 863 | 393.75 | 56.25  | 0.35 | 951.77 | 856.59 | 15.43 | 28 | 78.3 |                     |      |
| 864 | 350    | 50     | 0.4  | 970    | 873.63 | 8.14  | 28 | 62.1 |                     |      |
| 865 | 398.58 | 21.42  | 0.37 | 971.17 | 874.05 | 8.71  | 28 | 54.1 |                     |      |
| 866 | 337.5  | 112.5  | 0.4  | 915.35 | 823.82 | 7.33  | 28 | 79.9 |                     |      |
| 867 | 336.42 | 83.58  | 0.43 | 930.46 | 837.41 | 6.14  | 28 | 68.9 |                     |      |
| 868 | 393.75 | 56.25  | 0.4  | 920.98 | 828.88 | 5.29  | 28 | 79.1 |                     |      |
| 869 | 455.52 | 24.48  | 0.43 | 875    | 787.5  | 2.57  | 28 | 61.1 |                     |      |
| 870 | 398.58 | 21.42  | 0.43 | 936.68 | 843.02 | 3.57  | 28 | 58.1 |                     |      |
| 871 | 393.57 | 56.25  | 0.4  | 920.98 | 828.88 | 4.71  | 28 | 77.8 |                     |      |
| 872 | 393.75 | 56.25  | 0.4  | 920.98 | 828.88 | 4.57  | 28 | 80.2 |                     |      |
| 873 | 384.48 | 95.52  | 0.37 | 907.3  | 816.57 | 9.57  | 28 | 82.3 |                     |      |
| 874 | 437.5  | 62.5   | 0.4  | 871.27 | 784.14 | 4.29  | 28 | 82.2 |                     |      |
| 875 | 393.75 | 56.25  | 0.4  | 920.98 | 828.88 | 5.29  | 28 | 81.9 |                     |      |
| 876 | 450    | 0      | 0.4  | 926.62 | 833.95 | 2.33  | 28 | 57   | cube 100            | [38] |
| 877 | 480    | 0      | 0.32 | 979    | 817    | 3.51  | 3  | 20   |                     |      |
| 878 | 456    | 24     | 0.32 | 987    | 820    | 3.6   | 3  | 22   |                     |      |
| 879 | 432    | 48     | 0.32 | 987    | 815    | 3.72  | 3  | 23.9 |                     |      |
| 880 | 408    | 72     | 0.32 | 980    | 815    | 3.34  | 3  | 24.1 |                     |      |
| 881 | 384    | 96     | 0.32 | 989    | 805    | 2.8   | 3  | 21.3 |                     |      |
| 882 | 480    | 0      | 0.32 | 979    | 817    | 3.51  | 7  | 33   |                     |      |
| 883 | 456    | 24     | 0.32 | 987    | 820    | 3.6   | 7  | 35.6 |                     |      |
| 884 | 432    | 48     | 0.32 | 987    | 815    | 3.72  | 7  | 37.2 |                     |      |
| 885 | 408    | 72     | 0.32 | 980    | 815    | 3.34  | 7  | 35.1 |                     |      |
| 886 | 384    | 96     | 0.32 | 989    | 805    | 2.8   | 7  | 33.6 |                     |      |
| 887 | 480    | 0      | 0.32 | 979    | 817    | 3.51  | 14 | 35   |                     |      |
| 888 | 456    | 24     | 0.32 | 987    | 820    | 3.6   | 14 | 36.9 |                     |      |
| 889 | 432    | 48     | 0.32 | 987    | 815    | 3.72  | 14 | 39.3 |                     |      |
| 890 | 408    | 72     | 0.32 | 980    | 815    | 3.34  | 14 | 39.7 |                     |      |
| 891 | 384    | 96     | 0.32 | 989    | 805    | 2.8   | 14 | 36   |                     |      |
| 892 | 480    | 0      | 0.32 | 979    | 817    | 3.51  | 28 | 45   |                     |      |
| 893 | 456    | 24     | 0.32 | 987    | 820    | 3.6   | 28 | 46.1 |                     |      |
| 894 | 432    | 48     | 0.32 | 987    | 815    | 3.72  | 28 | 49.8 |                     |      |
| 895 | 408    | 72     | 0.32 | 980    | 815    | 3.34  | 28 | 50.3 |                     |      |
| 896 | 384    | 96     | 0.32 | 989    | 805    | 2.8   | 28 | 46   |                     |      |
| 897 | 480    | 0      | 0.32 | 979    | 817    | 3.51  | 56 | 53   |                     |      |

|     |     |      |      |      |      |       |    |      |          |      |
|-----|-----|------|------|------|------|-------|----|------|----------|------|
| 898 | 456 | 24   | 0.32 | 987  | 820  | 3.6   | 56 | 52   | cube 100 | [39] |
| 899 | 432 | 48   | 0.32 | 987  | 815  | 3.72  | 56 | 55   |          |      |
| 900 | 408 | 72   | 0.32 | 980  | 815  | 3.34  | 56 | 56.3 |          |      |
| 901 | 384 | 96   | 0.32 | 989  | 805  | 2.8   | 56 | 54.6 |          |      |
| 902 | 550 | 0    | 0.4  | 1502 | 0    | 6.82  | 1  | 25.8 |          |      |
| 903 | 523 | 27.5 | 0.4  | 1498 | 0    | 8.2   | 1  | 21   |          |      |
| 904 | 495 | 55   | 0.4  | 1494 | 0    | 10    | 1  | 32.7 |          |      |
| 905 | 468 | 82.5 | 0.4  | 1488 | 0    | 11.8  | 1  | 33   |          |      |
| 906 | 550 | 0    | 0.4  | 1502 | 0    | 6.82  | 3  | 57.9 |          |      |
| 907 | 523 | 27.5 | 0.4  | 1498 | 0    | 8.2   | 3  | 58.6 |          |      |
| 908 | 495 | 55   | 0.4  | 1494 | 0    | 10    | 3  | 52.9 |          |      |
| 909 | 468 | 82.5 | 0.4  | 1488 | 0    | 11.8  | 3  | 55.9 |          |      |
| 910 | 550 | 0    | 0.4  | 1502 | 0    | 6.82  | 7  | 66.5 |          |      |
| 911 | 523 | 27.5 | 0.4  | 1498 | 0    | 8.2   | 7  | 71.5 |          |      |
| 912 | 495 | 55   | 0.4  | 1494 | 0    | 10    | 7  | 73.7 |          |      |
| 913 | 468 | 82.5 | 0.4  | 1488 | 0    | 11.8  | 7  | 75.7 |          |      |
| 914 | 550 | 0    | 0.4  | 1502 | 0    | 6.82  | 14 | 71.6 |          |      |
| 915 | 523 | 27.5 | 0.4  | 1498 | 0    | 8.2   | 14 | 77.7 |          |      |
| 916 | 495 | 55   | 0.4  | 1494 | 0    | 10    | 14 | 81.8 |          |      |
| 917 | 468 | 82.5 | 0.4  | 1488 | 0    | 11.8  | 14 | 81.9 |          |      |
| 918 | 550 | 0    | 0.4  | 1502 | 0    | 6.82  | 28 | 72.7 |          |      |
| 919 | 523 | 27.5 | 0.4  | 1498 | 0    | 8.2   | 28 | 80.7 |          |      |
| 920 | 495 | 55   | 0.4  | 1494 | 0    | 10    | 28 | 85.1 |          |      |
| 921 | 468 | 82.5 | 0.4  | 1488 | 0    | 11.8  | 28 | 89.7 |          |      |
| 922 | 380 | 0    | 0.45 | 656  | 1169 | 0.76  | 7  | 23.7 | cube 100 | [40] |
| 923 | 361 | 19   | 0.45 | 656  | 1169 | 0.76  | 7  | 27.6 |          |      |
| 924 | 342 | 38   | 0.45 | 656  | 1169 | 0.76  | 7  | 31.4 |          |      |
| 925 | 323 | 57   | 0.45 | 656  | 1169 | 0.76  | 7  | 34.8 |          |      |
| 926 | 304 | 76   | 0.45 | 656  | 1169 | 0.76  | 7  | 33.1 |          |      |
| 927 | 285 | 95   | 0.45 | 656  | 1169 | 0.76  | 7  | 32.1 |          |      |
| 928 | 266 | 114  | 0.45 | 656  | 1169 | 0.76  | 7  | 30.4 |          |      |
| 929 | 380 | 0    | 0.45 | 656  | 1169 | 0.76  | 28 | 39.4 |          |      |
| 930 | 361 | 19   | 0.45 | 656  | 1169 | 0.76  | 28 | 42.7 |          |      |
| 931 | 342 | 38   | 0.45 | 656  | 1169 | 0.76  | 28 | 46.1 |          |      |
| 932 | 323 | 57   | 0.45 | 656  | 1169 | 0.76  | 28 | 49.4 |          |      |
| 933 | 304 | 76   | 0.45 | 656  | 1169 | 0.76  | 28 | 48.4 |          |      |
| 934 | 285 | 95   | 0.45 | 656  | 1169 | 0.76  | 28 | 47.3 |          |      |
| 935 | 266 | 114  | 0.45 | 656  | 1169 | 0.76  | 28 | 45.1 |          |      |
| 936 | 500 | 0    | 0.38 | 650  | 900  | 5     | 7  | 45   | cube 100 | [41] |
| 937 | 450 | 50   | 0.38 | 650  | 900  | 7.5   | 7  | 56.3 |          |      |
| 938 | 500 | 0    | 0.38 | 650  | 900  | 5     | 28 | 52.5 |          |      |
| 939 | 450 | 50   | 0.38 | 650  | 900  | 7.5   | 28 | 61.5 |          |      |
| 940 | 440 | 0    | 0.34 | 1172 | 580  | 10.17 | 28 | 70   | cube 150 | [42] |
| 941 | 418 | 22   | 0.34 | 1172 | 580  | 10.17 | 28 | 59   |          |      |

|     |        |       |      |       |       |       |    |       |          |      |
|-----|--------|-------|------|-------|-------|-------|----|-------|----------|------|
| 942 | 396    | 44    | 0.34 | 1172  | 580   | 10.17 | 28 | 62    |          |      |
| 943 | 374    | 66    | 0.34 | 1172  | 580   | 10.17 | 28 | 62.7  |          |      |
| 944 | 352    | 88    | 0.34 | 1172  | 580   | 10.17 | 28 | 55    |          |      |
| 945 | 425    | 0     | 0.4  | 1172  | 580   | 3.7   | 28 | 63    |          |      |
| 946 | 403.75 | 21.25 | 0.4  | 1172  | 580   | 3.7   | 28 | 57    |          |      |
| 947 | 382.5  | 42.5  | 0.4  | 1172  | 580   | 3.7   | 28 | 44    |          |      |
| 948 | 361.25 | 63.75 | 0.4  | 1172  | 580   | 3.7   | 28 | 47.5  |          |      |
| 949 | 340    | 85    | 0.4  | 1172  | 580   | 3.7   | 28 | 38.5  |          |      |
| 950 | 400    | 0     | 0.45 | 1100  | 720   | 0     | 28 | 53.5  |          |      |
| 951 | 380    | 20    | 0.45 | 1100  | 720   | 1.28  | 28 | 46.5  |          |      |
| 952 | 360    | 40    | 0.45 | 1100  | 720   | 1.28  | 28 | 40.05 |          |      |
| 953 | 340    | 60    | 0.45 | 1100  | 720   | 1.28  | 28 | 31    |          |      |
| 954 | 320    | 80    | 0.45 | 1100  | 720   | 1.28  | 28 | 36    |          |      |
| 955 | 465    | 0     | 0.4  | 840   | 820   | 6.98  | 7  | 48.4  | cube 100 | [43] |
| 956 | 441.75 | 13.4  | 0.4  | 840   | 820   | 6.63  | 7  | 50.6  |          |      |
| 957 | 465    | 0     | 0.4  | 840   | 820   | 6.98  | 28 | 58.4  |          |      |
| 958 | 441.75 | 13.4  | 0.4  | 840   | 820   | 6.63  | 28 | 62.2  |          |      |
| 959 | 400    | 0     | 0.55 | 880   | 800   | 8     | 7  | 36    | cube 100 | [44] |
| 960 | 380    | 20    | 0.55 | 880   | 800   | 8     | 7  | 38.75 |          |      |
| 961 | 360    | 40    | 0.55 | 880   | 800   | 8     | 7  | 42    |          |      |
| 962 | 340    | 60    | 0.55 | 880   | 800   | 8     | 7  | 43.9  |          |      |
| 963 | 320    | 80    | 0.55 | 880   | 800   | 8     | 7  | 44.4  |          |      |
| 964 | 300    | 100   | 0.55 | 880   | 800   | 8     | 7  | 41.8  |          |      |
| 965 | 280    | 120   | 0.55 | 880   | 800   | 8     | 7  | 40    |          |      |
| 966 | 400    | 0     | 0.55 | 880   | 800   | 8     | 28 | 41    |          |      |
| 967 | 380    | 20    | 0.55 | 880   | 800   | 8     | 28 | 47    |          |      |
| 968 | 360    | 40    | 0.55 | 880   | 800   | 8     | 28 | 52.3  |          |      |
| 969 | 340    | 60    | 0.55 | 880   | 800   | 8     | 28 | 54.5  |          |      |
| 970 | 320    | 80    | 0.55 | 880   | 800   | 8     | 28 | 57.2  |          |      |
| 971 | 300    | 100   | 0.55 | 880   | 800   | 8     | 28 | 53.7  |          |      |
| 972 | 280    | 120   | 0.55 | 880   | 800   | 8     | 28 | 51.7  |          |      |
| 973 | 400    | 0     | 0.55 | 880   | 800   | 8     | 90 | 43.75 |          |      |
| 974 | 380    | 20    | 0.55 | 880   | 800   | 8     | 90 | 51    |          |      |
| 975 | 360    | 40    | 0.55 | 880   | 800   | 8     | 90 | 52.9  |          |      |
| 976 | 340    | 60    | 0.55 | 880   | 800   | 8     | 90 | 56.1  |          |      |
| 977 | 320    | 80    | 0.55 | 880   | 800   | 8     | 90 | 57.2  |          |      |
| 978 | 300    | 100   | 0.55 | 880   | 800   | 8     | 90 | 55.03 |          |      |
| 979 | 280    | 120   | 0.55 | 880   | 800   | 8     | 90 | 52.7  |          |      |
| 980 | 570    | 0     | 0.28 | 830.8 | 863.1 | 5.13  | 28 | 68.6  | cube 150 | [45] |
| 981 | 541.5  | 28.5  | 0.28 | 823.9 | 857.8 | 6.84  | 28 | 83.9  |          |      |
| 982 | 484.5  | 85.5  | 0.28 | 812.3 | 849.2 | 8.55  | 28 | 86.8  |          |      |

Table S2: Experimental database of  $f_{st}$  of concrete with metakaolin

| S.No. | Cement<br>(kg/m <sup>3</sup> ) | Metakaolin<br>(kg/m <sup>3</sup> ) | w/b      | Fine<br>aggregate<br>(kg/m <sup>3</sup> ) | Coarse<br>aggregate<br>(kg/m <sup>3</sup> ) | SP<br>(kg/m <sup>3</sup> ) | Days | $f_{st}$<br>(MPa) | Cylinder<br>(mm) | Ref. |
|-------|--------------------------------|------------------------------------|----------|-------------------------------------------|---------------------------------------------|----------------------------|------|-------------------|------------------|------|
| 1     | 533.33                         | 0                                  | 0.300002 | 677                                       | 1201                                        | 2.13                       | 28   | 4.76              | 100*200          | [3]  |
| 2     | 506.67                         | 26.67                              | 0.299996 | 666                                       | 1182                                        | 2.93                       | 28   | 4.78              |                  |      |
| 3     | 480                            | 53.33                              | 0.300002 | 655                                       | 1163                                        | 3.47                       | 28   | 5.19              |                  |      |
| 4     | 453.33                         | 80                                 | 0.300002 | 645                                       | 1144                                        | 4.26                       | 28   | 4.69              |                  |      |
| 5     | 490                            | 0                                  | 0.32     | 967                                       | 817                                         | 2.47                       | 28   | 3.04              | 150*300          | [5]  |
| 6     | 466                            | 24.5                               | 0.32     | 967                                       | 815                                         | 4.57                       | 28   | 3.244             |                  |      |
| 7     | 441                            | 49                                 | 0.32     | 975                                       | 805                                         | 7.02                       | 28   | 3.38              |                  |      |
| 8     | 417                            | 73.5                               | 0.32     | 980                                       | 800                                         | 7.35                       | 28   | 3.36              |                  |      |
| 9     | 392                            | 98                                 | 0.32     | 985                                       | 795                                         | 9.96                       | 28   | 3.12              |                  |      |
| 10    | 460                            | 0                                  | 0.38     | 940                                       | 815                                         | 1.73                       | 28   | 2.8               |                  |      |
| 11    | 437                            | 23                                 | 0.38     | 947                                       | 810                                         | 3.31                       | 28   | 2.94              |                  |      |
| 12    | 414                            | 46                                 | 0.38     | 958                                       | 800                                         | 3.6                        | 28   | 3.02              |                  |      |
| 13    | 391                            | 69                                 | 0.38     | 964                                       | 790                                         | 4.89                       | 28   | 3.04              |                  |      |
| 14    | 368                            | 92                                 | 0.38     | 970                                       | 781                                         | 4.89                       | 28   | 2.8               |                  |      |
| 15    | 435                            | 0                                  | 0.45     | 920                                       | 815                                         | 1.63                       | 28   | 2.56              |                  |      |
| 16    | 414                            | 21.8                               | 0.45     | 925                                       | 805                                         | 1.95                       | 28   | 2.72              |                  |      |
| 17    | 392                            | 43.5                               | 0.45     | 933                                       | 800                                         | 2.93                       | 28   | 2.82              |                  |      |
| 18    | 370                            | 65.2                               | 0.45     | 940                                       | 795                                         | 3.26                       | 28   | 2.8               |                  |      |
| 19    | 348                            | 87                                 | 0.45     | 945                                       | 785                                         | 3.91                       | 28   | 2.59              |                  |      |
| 20    | 450                            | 0                                  | 0.35     | 957                                       | 852                                         | 7.9                        | 1    | 1.75              | 100*200          | [7]  |
| 21    | 405                            | 45                                 | 0.35     | 952                                       | 848                                         | 10.1                       | 1    | 2.2               |                  |      |
| 22    | 360                            | 90                                 | 0.35     | 948                                       | 844                                         | 12.4                       | 1    | 2.35              |                  |      |
| 23    | 350                            | 0                                  | 0.55     | 960                                       | 854                                         | 3.5                        | 1    | 1.2               |                  |      |
| 24    | 315                            | 35                                 | 0.55     | 956                                       | 851                                         | 4.4                        | 1    | 1.2               |                  |      |
| 25    | 280                            | 70                                 | 0.55     | 953                                       | 848                                         | 6.1                        | 1    | 1.25              |                  |      |
| 26    | 450                            | 0                                  | 0.35     | 957                                       | 852                                         | 7.9                        | 3    | 2.27              |                  |      |
| 27    | 405                            | 45                                 | 0.35     | 952                                       | 848                                         | 10.1                       | 3    | 2.4               |                  |      |
| 28    | 360                            | 90                                 | 0.35     | 948                                       | 844                                         | 12.4                       | 3    | 2.5               |                  |      |
| 29    | 350                            | 0                                  | 0.55     | 960                                       | 854                                         | 3.5                        | 3    | 1.6               |                  |      |
| 30    | 315                            | 35                                 | 0.55     | 956                                       | 851                                         | 4.4                        | 3    | 1.7               |                  |      |
| 31    | 280                            | 70                                 | 0.55     | 953                                       | 848                                         | 6.1                        | 3    | 2                 |                  |      |
| 32    | 450                            | 0                                  | 0.35     | 957                                       | 852                                         | 7.9                        | 7    | 2.35              |                  |      |
| 33    | 405                            | 45                                 | 0.35     | 952                                       | 848                                         | 10.1                       | 7    | 2.5               |                  |      |
| 34    | 360                            | 90                                 | 0.35     | 948                                       | 844                                         | 12.4                       | 7    | 2.6               |                  |      |
| 35    | 350                            | 0                                  | 0.55     | 960                                       | 854                                         | 3.5                        | 7    | 2.15              |                  |      |
| 36    | 315                            | 35                                 | 0.55     | 956                                       | 851                                         | 4.4                        | 7    | 2.25              |                  |      |
| 37    | 280                            | 70                                 | 0.55     | 953                                       | 848                                         | 6.1                        | 7    | 2.3               |                  |      |
| 38    | 450                            | 0                                  | 0.35     | 957                                       | 852                                         | 7.9                        | 28   | 2.9               |                  |      |
| 39    | 405                            | 45                                 | 0.35     | 952                                       | 848                                         | 10.1                       | 28   | 3                 |                  |      |
| 40    | 360                            | 90                                 | 0.35     | 948                                       | 844                                         | 12.4                       | 28   | 3.1               |                  |      |

|    |        |       |          |        |         |      |     |      |         |      |
|----|--------|-------|----------|--------|---------|------|-----|------|---------|------|
| 41 | 350    | 0     | 0.55     | 960    | 854     | 3.5  | 28  | 2.35 |         |      |
| 42 | 315    | 35    | 0.55     | 956    | 851     | 4.4  | 28  | 2.5  |         |      |
| 43 | 280    | 70    | 0.55     | 953    | 848     | 6.1  | 28  | 2.55 |         |      |
| 44 | 450    | 0     | 0.35     | 957    | 852     | 7.9  | 90  | 3.04 |         |      |
| 45 | 405    | 45    | 0.35     | 952    | 848     | 10.1 | 90  | 3.4  |         |      |
| 46 | 360    | 90    | 0.35     | 948    | 844     | 12.4 | 90  | 3.6  |         |      |
| 47 | 350    | 0     | 0.55     | 960    | 854     | 3.5  | 90  | 2.4  |         |      |
| 48 | 315    | 35    | 0.55     | 956    | 851     | 4.4  | 90  | 2.65 |         |      |
| 49 | 280    | 70    | 0.55     | 953    | 848     | 6.1  | 90  | 2.9  |         |      |
| 50 | 450    | 0     | 0.35     | 957    | 852     | 7.9  | 120 | 3.3  |         |      |
| 51 | 405    | 45    | 0.35     | 952    | 848     | 10.1 | 120 | 3.7  |         |      |
| 52 | 360    | 90    | 0.35     | 948    | 844     | 12.4 | 120 | 3.85 |         |      |
| 53 | 350    | 0     | 0.55     | 960    | 854     | 3.5  | 120 | 2.7  |         |      |
| 54 | 315    | 35    | 0.55     | 956    | 851     | 4.4  | 120 | 3    |         |      |
| 55 | 280    | 70    | 0.55     | 953    | 848     | 6.1  | 120 | 3.25 |         |      |
| 56 | 437.78 | 0     | 0.449998 | 643.68 | 1104.36 | 0    | 28  | 2.79 | 150*300 | [8]  |
| 57 | 415.89 | 21.89 | 0.449998 | 643.68 | 1104.36 | 0    | 28  | 2.81 |         |      |
| 58 | 394    | 43.78 | 0.449998 | 643.68 | 1104.36 | 0    | 28  | 2.9  |         |      |
| 59 | 372.11 | 65.67 | 0.449998 | 643.68 | 1104.36 | 0    | 28  | 3.04 |         |      |
| 60 | 350.22 | 87.56 | 0.449998 | 643.68 | 1104.36 | 0    | 28  | 2.95 |         |      |
| 61 | 512    | 0     | 0.319141 | 594    | 1037    | 5.12 | 28  | 5.02 | 150*300 | [11] |
| 62 | 512    | 51.2  | 0.290128 | 594    | 1037    | 5.12 | 28  | 5.26 |         |      |
| 63 | 512    | 76.8  | 0.277514 | 594    | 1037    | 5.12 | 28  | 5.48 |         |      |
| 64 | 512    | 102.4 | 0.265951 | 594    | 1037    | 5.12 | 28  | 5.15 |         |      |
| 65 | 512    | 153.6 | 0.245493 | 594    | 1037    | 5.12 | 28  | 5.04 |         |      |
| 66 | 512    | 204.8 | 0.227958 | 594    | 1037    | 5.12 | 28  | 4.43 |         |      |
| 67 | 512    | 256   | 0.21276  | 594    | 1037    | 5.12 | 28  | 4.14 |         |      |
| 68 | 400    | 0     | 0.5      | 545    | 1012    | 0    | 7   | 2.7  | 150*300 | [12] |
| 69 | 400    | 10    | 0.554268 | 490.5  | 1012    | 0    | 7   | 2.85 |         |      |
| 70 | 400    | 20    | 0.605952 | 436    | 1012    | 0    | 7   | 2.92 |         |      |
| 71 | 400    | 30    | 0.655233 | 317.8  | 1012    | 0    | 7   | 3    |         |      |
| 72 | 400    | 40    | 0.702273 | 327    | 1012    | 0    | 7   | 3.15 |         |      |
| 73 | 400    | 50    | 0.747222 | 272.5  | 1012    | 0    | 7   | 2.7  |         |      |
| 74 | 400    | 0     | 0.5      | 545    | 1012    | 0    | 28  | 3    |         |      |
| 75 | 400    | 10    | 0.554268 | 490.5  | 1012    | 0    | 28  | 3.1  |         |      |
| 76 | 400    | 20    | 0.605952 | 436    | 1012    | 0    | 28  | 3.25 |         |      |
| 77 | 400    | 30    | 0.655233 | 317.8  | 1012    | 0    | 28  | 3.4  |         |      |
| 78 | 400    | 40    | 0.702273 | 327    | 1012    | 0    | 28  | 3.55 |         |      |
| 79 | 400    | 50    | 0.747222 | 272.5  | 1012    | 0    | 28  | 2.96 |         |      |
| 80 | 400    | 0     | 0.5      | 545    | 1012    | 0    | 91  | 3.45 |         |      |
| 81 | 400    | 10    | 0.554268 | 490.5  | 1012    | 0    | 91  | 3.5  |         |      |
| 82 | 400    | 20    | 0.605952 | 436    | 1012    | 0    | 91  | 3.6  |         |      |
| 83 | 400    | 30    | 0.655233 | 317.8  | 1012    | 0    | 91  | 3.7  |         |      |
| 84 | 400    | 40    | 0.702273 | 327    | 1012    | 0    | 91  | 3.9  |         |      |

|     |        |       |          |        |         |      |    |      |         |      |
|-----|--------|-------|----------|--------|---------|------|----|------|---------|------|
| 85  | 400    | 50    | 0.747222 | 272.5  | 1012    | 0    | 91 | 3.25 |         |      |
| 86  | 500    | 0     | 0.38     | 900    | 650     | 3    | 28 | 3.5  | 150*300 | [16] |
| 87  | 475    | 25    | 0.38     | 900    | 650     | 3    | 28 | 3.65 |         |      |
| 88  | 450    | 50    | 0.38     | 900    | 650     | 4    | 28 | 5.72 |         |      |
| 89  | 425    | 75    | 0.38     | 900    | 650     | 5    | 28 | 5.3  |         |      |
| 90  | 420    | 0     | 0.430952 | 668    | 1232    | 0    | 28 | 3.2  | 150*300 | [17] |
| 91  | 399    | 21    | 0.430952 | 668    | 1232    | 0    | 28 | 3.27 |         |      |
| 92  | 378    | 42    | 0.430952 | 668    | 1232    | 0    | 28 | 3.44 |         |      |
| 93  | 357    | 63    | 0.430952 | 668    | 1232    | 0    | 28 | 3.4  |         |      |
| 94  | 336    | 84    | 0.430952 | 668    | 1232    | 0    | 28 | 3.25 |         |      |
| 95  | 434.32 | 0     | 0.430006 | 624.77 | 1264.97 | 0    | 7  | 3.1  | 100*200 | [19] |
| 96  | 412.6  | 21.72 | 0.430006 | 624.77 | 1264.97 | 0    | 7  | 3.5  |         |      |
| 97  | 390.89 | 43.43 | 0.430006 | 624.77 | 1264.97 | 0    | 7  | 3.8  |         |      |
| 98  | 325.74 | 65.12 | 0.477818 | 624.77 | 1264.97 | 0    | 7  | 3.55 |         |      |
| 99  | 304.02 | 86.86 | 0.477794 | 624.77 | 1264.97 | 0    | 7  | 3.2  |         |      |
| 100 | 434.32 | 0     | 0.430006 | 843.43 | 822.23  | 1.52 | 7  | 3.17 |         |      |
| 101 | 412.6  | 21.72 | 0.430006 | 843.43 | 822.23  | 1.52 | 7  | 3.67 |         |      |
| 102 | 390.89 | 43.43 | 0.430006 | 843.43 | 822.23  | 1.52 | 7  | 3.75 |         |      |
| 103 | 325.74 | 65.12 | 0.477818 | 843.43 | 822.23  | 1.52 | 7  | 3.83 |         |      |
| 104 | 304.02 | 86.86 | 0.477794 | 843.43 | 822.23  | 1.52 | 7  | 3.89 |         |      |
| 105 | 434.32 | 0     | 0.430006 | 624.77 | 1264.97 | 0    | 28 | 3.95 |         |      |
| 106 | 412.6  | 21.72 | 0.430006 | 624.77 | 1264.97 | 0    | 28 | 4.15 |         |      |
| 107 | 390.89 | 43.43 | 0.430006 | 624.77 | 1264.97 | 0    | 28 | 4.56 |         |      |
| 108 | 325.74 | 65.12 | 0.477818 | 624.77 | 1264.97 | 0    | 28 | 4.2  |         |      |
| 109 | 304.02 | 86.86 | 0.477794 | 624.77 | 1264.97 | 0    | 28 | 4    |         |      |
| 110 | 434.32 | 0     | 0.430006 | 843.43 | 822.23  | 1.52 | 28 | 4.12 |         |      |
| 111 | 412.6  | 21.72 | 0.430006 | 843.43 | 822.23  | 1.52 | 28 | 4.63 |         |      |
| 112 | 390.89 | 43.43 | 0.430006 | 843.43 | 822.23  | 1.52 | 28 | 4.75 |         |      |
| 113 | 325.74 | 65.12 | 0.477818 | 843.43 | 822.23  | 1.52 | 28 | 4.8  |         |      |
| 114 | 304.02 | 86.86 | 0.477794 | 843.43 | 822.23  | 1.52 | 28 | 4.83 |         |      |
| 115 | 434.32 | 0     | 0.430006 | 624.77 | 1264.97 | 0    | 90 | 4.55 |         |      |
| 116 | 412.6  | 21.72 | 0.430006 | 624.77 | 1264.97 | 0    | 90 | 4.67 |         |      |
| 117 | 390.89 | 43.43 | 0.430006 | 624.77 | 1264.97 | 0    | 90 | 4.9  |         |      |
| 118 | 325.74 | 65.12 | 0.477818 | 624.77 | 1264.97 | 0    | 90 | 4.76 |         |      |
| 119 | 304.02 | 86.86 | 0.477794 | 624.77 | 1264.97 | 0    | 90 | 4.61 |         |      |
| 120 | 434.32 | 0     | 0.430006 | 843.43 | 822.23  | 1.52 | 90 | 4.72 |         |      |
| 121 | 412.6  | 21.72 | 0.430006 | 843.43 | 822.23  | 1.52 | 90 | 5.12 |         |      |
| 122 | 390.89 | 43.43 | 0.430006 | 843.43 | 822.23  | 1.52 | 90 | 5.28 |         |      |
| 123 | 325.74 | 65.12 | 0.477818 | 843.43 | 822.23  | 1.52 | 90 | 5.32 |         |      |
| 124 | 304.02 | 86.86 | 0.477794 | 843.43 | 822.23  | 1.52 | 90 | 5.38 |         |      |
| 125 | 550    | 0     | 0.25     | 579.5  | 177.9   | 4.23 | 3  | 4.6  | 150*300 | [25] |
| 126 | 522.5  | 27.5  | 0.25     | 576.4  | 177     | 5.4  | 3  | 4.7  |         |      |
| 127 | 467.5  | 82.5  | 0.25     | 570.3  | 175.1   | 8.4  | 3  | 3.7  |         |      |
| 128 | 470    | 0     | 0.35     | 579.1  | 177.8   | 1.86 | 3  | 2.25 |         |      |

|     |       |      |      |       |       |       |    |      |         |      |
|-----|-------|------|------|-------|-------|-------|----|------|---------|------|
| 129 | 446.5 | 23.5 | 0.35 | 576.5 | 177   | 3     | 3  | 2.75 |         |      |
| 130 | 399.5 | 70.5 | 0.35 | 571.2 | 175.4 | 4.31  | 3  | 3.55 |         |      |
| 131 | 550   | 0    | 0.25 | 579.5 | 177.9 | 4.23  | 7  | 4.72 |         |      |
| 132 | 522.5 | 27.5 | 0.25 | 576.4 | 177   | 5.4   | 7  | 5.3  |         |      |
| 133 | 467.5 | 82.5 | 0.25 | 570.3 | 175.1 | 8.4   | 7  | 5.5  |         |      |
| 134 | 470   | 0    | 0.35 | 579.1 | 177.8 | 1.86  | 7  | 3.2  |         |      |
| 135 | 446.5 | 23.5 | 0.35 | 576.5 | 177   | 3     | 7  | 3.2  |         |      |
| 136 | 399.5 | 70.5 | 0.35 | 571.2 | 175.4 | 4.31  | 7  | 4.07 |         |      |
| 137 | 550   | 0    | 0.25 | 579.5 | 177.9 | 4.23  | 28 | 5.27 |         |      |
| 138 | 522.5 | 27.5 | 0.25 | 576.4 | 177   | 5.4   | 28 | 5.8  |         |      |
| 139 | 467.5 | 82.5 | 0.25 | 570.3 | 175.1 | 8.4   | 28 | 5.88 |         |      |
| 140 | 470   | 0    | 0.35 | 579.1 | 177.8 | 1.86  | 28 | 3.5  |         |      |
| 141 | 446.5 | 23.5 | 0.35 | 576.5 | 177   | 3     | 28 | 3.92 |         |      |
| 142 | 399.5 | 70.5 | 0.35 | 571.2 | 175.4 | 4.31  | 28 | 4.4  | 150*300 | [26] |
| 143 | 380   | 0    | 0.5  | 755   | 685   | 7.6   | 28 | 2.75 |         |      |
| 144 | 361   | 19   | 0.5  | 755   | 685   | 7.6   | 28 | 2.75 |         |      |
| 145 | 342   | 38   | 0.5  | 755   | 685   | 7.6   | 28 | 3    |         |      |
| 146 | 323   | 57   | 0.5  | 755   | 685   | 7.6   | 28 | 3.2  |         |      |
| 147 | 304   | 76   | 0.5  | 755   | 685   | 7.6   | 28 | 3.3  |         |      |
| 148 | 285   | 95   | 0.5  | 755   | 685   | 7.6   | 28 | 3.12 |         |      |
| 149 | 266   | 114  | 0.5  | 755   | 685   | 7.6   | 28 | 2.8  | 150*150 | [30] |
| 150 | 450   | 0    | 0.4  | 670   | 1100  | 1.125 | 7  | 3.59 |         |      |
| 151 | 427.5 | 22.5 | 0.4  | 670   | 1100  | 2.25  | 7  | 4.15 |         |      |
| 152 | 405   | 45   | 0.4  | 670   | 1100  | 3.375 | 7  | 4.98 |         |      |
| 153 | 382.5 | 67.5 | 0.4  | 670   | 1100  | 4.5   | 7  | 5.58 |         |      |
| 154 | 360   | 90   | 0.4  | 670   | 1100  | 4.5   | 7  | 4.4  |         |      |
| 155 | 450   | 0    | 0.4  | 670   | 1100  | 1.125 | 28 | 4.19 |         |      |
| 156 | 427.5 | 22.5 | 0.4  | 670   | 1100  | 2.25  | 28 | 4.89 |         |      |
| 157 | 405   | 45   | 0.4  | 670   | 1100  | 3.375 | 28 | 5.2  |         |      |
| 158 | 382.5 | 67.5 | 0.4  | 670   | 1100  | 4.5   | 28 | 5.42 |         |      |
| 159 | 450   | 0    | 0.4  | 670   | 1100  | 1.125 | 56 | 4.39 |         |      |
| 160 | 427.5 | 22.5 | 0.4  | 670   | 1100  | 2.25  | 56 | 5.73 |         |      |
| 161 | 405   | 45   | 0.4  | 670   | 1100  | 3.375 | 56 | 5.78 |         |      |
| 162 | 382.5 | 67.5 | 0.4  | 670   | 1100  | 4.5   | 56 | 5.4  |         |      |
| 163 | 360   | 90   | 0.4  | 670   | 1100  | 4.5   | 56 | 5.64 |         |      |
| 164 | 450   | 0    | 0.4  | 670   | 1100  | 1.125 | 90 | 5.15 |         |      |
| 165 | 427.5 | 22.5 | 0.4  | 670   | 1100  | 2.25  | 90 | 5.66 |         |      |
| 166 | 405   | 45   | 0.4  | 670   | 1100  | 3.375 | 90 | 5.82 |         |      |
| 167 | 382.5 | 67.5 | 0.4  | 670   | 1100  | 4.5   | 90 | 5.62 | 150*300 | [38] |
| 168 | 480   | 0    | 0.32 | 979   | 817   | 3.51  | 28 | 3.3  |         |      |
| 169 | 456   | 24   | 0.32 | 987   | 820   | 3.6   | 28 | 3.3  |         |      |
| 170 | 432   | 48   | 0.32 | 987   | 815   | 3.72  | 28 | 3.5  |         |      |
| 171 | 408   | 72   | 0.32 | 980   | 815   | 3.34  | 28 | 3.6  |         |      |
| 172 | 384   | 96   | 0.32 | 989   | 805   | 2.8   | 28 | 3.2  |         |      |

|     |        |      |      |       |       |      |    |      |         |      |
|-----|--------|------|------|-------|-------|------|----|------|---------|------|
| 173 | 500    | 0    | 0.38 | 650   | 900   | 5    | 7  | 2.9  | 100*200 | [41] |
| 174 | 450    | 50   | 0.38 | 650   | 900   | 7.5  | 7  | 3.36 |         |      |
| 175 | 500    | 0    | 0.38 | 650   | 900   | 5    | 28 | 3.2  |         |      |
| 176 | 450    | 50   | 0.38 | 650   | 900   | 7.5  | 28 | 3.74 |         |      |
| 177 | 465    | 0    | 0.4  | 840   | 820   | 6.98 | 7  | 2.49 | 100*200 | [43] |
| 178 | 441.75 | 13.4 | 0.4  | 840   | 820   | 6.63 | 7  | 2.79 |         |      |
| 179 | 465    | 0    | 0.4  | 840   | 820   | 6.98 | 28 | 3.13 |         |      |
| 180 | 441.75 | 13.4 | 0.4  | 840   | 820   | 6.63 | 28 | 3.36 |         |      |
| 181 | 400    | 0    | 0.55 | 880   | 800   | 8    | 7  | 2.2  | 150*300 | [44] |
| 182 | 380    | 20   | 0.55 | 880   | 800   | 8    | 7  | 2.33 |         |      |
| 183 | 360    | 40   | 0.55 | 880   | 800   | 8    | 7  | 2.64 |         |      |
| 184 | 340    | 60   | 0.55 | 880   | 800   | 8    | 7  | 2.76 |         |      |
| 185 | 320    | 80   | 0.55 | 880   | 800   | 8    | 7  | 2.88 |         |      |
| 186 | 300    | 100  | 0.55 | 880   | 800   | 8    | 7  | 2.7  |         |      |
| 187 | 280    | 120  | 0.55 | 880   | 800   | 8    | 7  | 2.71 |         |      |
| 188 | 400    | 0    | 0.55 | 880   | 800   | 8    | 28 | 2.38 |         |      |
| 189 | 380    | 20   | 0.55 | 880   | 800   | 8    | 28 | 2.74 |         |      |
| 190 | 360    | 40   | 0.55 | 880   | 800   | 8    | 28 | 2.92 |         |      |
| 191 | 340    | 60   | 0.55 | 880   | 800   | 8    | 28 | 3.15 |         |      |
| 192 | 320    | 80   | 0.55 | 880   | 800   | 8    | 28 | 3.31 |         |      |
| 193 | 300    | 100  | 0.55 | 880   | 800   | 8    | 28 | 3.1  |         |      |
| 194 | 280    | 120  | 0.55 | 880   | 800   | 8    | 28 | 2.95 |         |      |
| 195 | 400    | 0    | 0.55 | 880   | 800   | 8    | 90 | 2.57 |         |      |
| 196 | 380    | 20   | 0.55 | 880   | 800   | 8    | 90 | 2.8  |         |      |
| 197 | 360    | 40   | 0.55 | 880   | 800   | 8    | 90 | 3.02 |         |      |
| 198 | 340    | 60   | 0.55 | 880   | 800   | 8    | 90 | 3.24 |         |      |
| 199 | 320    | 80   | 0.55 | 880   | 800   | 8    | 90 | 3.6  |         |      |
| 200 | 300    | 100  | 0.55 | 880   | 800   | 8    | 90 | 3.15 |         |      |
| 201 | 280    | 120  | 0.55 | 880   | 800   | 8    | 90 | 3.08 |         |      |
| 202 | 570    | 0    | 0.28 | 830.8 | 863.1 | 5.13 | 28 | 4.04 | 150*300 | [45] |
| 203 | 541.5  | 28.5 | 0.28 | 823.9 | 857.8 | 6.84 | 28 | 4.82 |         |      |
| 204 | 484.5  | 85.5 | 0.28 | 812.3 | 849.2 | 8.55 | 28 | 5.32 |         |      |

Table S3: Experimental database of FS of concrete with metakaolin

| S.No. | Cement<br>(kg/m <sup>3</sup> ) | Metakaolin<br>(kg/m <sup>3</sup> ) | w/b      | Fine<br>aggregate<br>(kg/m <sup>3</sup> ) | Coarse<br>aggregate<br>(kg/m <sup>3</sup> ) | SP<br>(kg/m <sup>3</sup> ) | Days | FS<br>(MPa) | Ref. |
|-------|--------------------------------|------------------------------------|----------|-------------------------------------------|---------------------------------------------|----------------------------|------|-------------|------|
| 1     | 434.32                         | 0                                  | 0.430006 | 624.77                                    | 1264.97                                     | 0                          | 7    | 4.5         | [19] |
| 2     | 412.6                          | 21.72                              | 0.430006 | 624.77                                    | 1264.97                                     | 0                          | 7    | 5.45        |      |
| 3     | 390.89                         | 43.43                              | 0.430006 | 624.77                                    | 1264.97                                     | 0                          | 7    | 6.2         |      |
| 4     | 325.74                         | 65.12                              | 0.477818 | 624.77                                    | 1264.97                                     | 0                          | 7    | 5.8         |      |
| 5     | 304.02                         | 86.86                              | 0.477794 | 624.77                                    | 1264.97                                     | 0                          | 7    | 5.6         |      |

|    |        |       |          |        |         |       |    |       |      |
|----|--------|-------|----------|--------|---------|-------|----|-------|------|
| 6  | 434.32 | 0     | 0.430006 | 843.43 | 822.23  | 1.52  | 7  | 4.6   |      |
| 7  | 412.6  | 21.72 | 0.430006 | 843.43 | 822.23  | 1.52  | 7  | 5.625 |      |
| 8  | 390.89 | 43.43 | 0.430006 | 843.43 | 822.23  | 1.52  | 7  | 6.4   |      |
| 9  | 325.74 | 65.12 | 0.477818 | 843.43 | 822.23  | 1.52  | 7  | 6.62  |      |
| 10 | 304.02 | 86.86 | 0.477794 | 843.43 | 822.23  | 1.52  | 7  | 6.7   |      |
| 11 | 434.32 | 0     | 0.430006 | 624.77 | 1264.97 | 0     | 28 | 5.4   |      |
| 12 | 412.6  | 21.72 | 0.430006 | 624.77 | 1264.97 | 0     | 28 | 6.8   |      |
| 13 | 390.89 | 43.43 | 0.430006 | 624.77 | 1264.97 | 0     | 28 | 7.6   |      |
| 14 | 325.74 | 65.12 | 0.477818 | 624.77 | 1264.97 | 0     | 28 | 7.4   |      |
| 15 | 304.02 | 86.86 | 0.477794 | 624.77 | 1264.97 | 0     | 28 | 7.22  |      |
| 16 | 434.32 | 0     | 0.430006 | 843.43 | 822.23  | 1.52  | 28 | 5.5   |      |
| 17 | 412.6  | 21.72 | 0.430006 | 843.43 | 822.23  | 1.52  | 28 | 6.9   |      |
| 18 | 390.89 | 43.43 | 0.430006 | 843.43 | 822.23  | 1.52  | 28 | 7.8   |      |
| 19 | 325.74 | 65.12 | 0.477818 | 843.43 | 822.23  | 1.52  | 28 | 8.4   |      |
| 20 | 304.02 | 86.86 | 0.477794 | 843.43 | 822.23  | 1.52  | 28 | 8.8   |      |
| 21 | 434.32 | 0     | 0.430006 | 624.77 | 1264.97 | 0     | 90 | 6.75  |      |
| 22 | 412.6  | 21.72 | 0.430006 | 624.77 | 1264.97 | 0     | 90 | 8.8   |      |
| 23 | 390.89 | 43.43 | 0.430006 | 624.77 | 1264.97 | 0     | 90 | 10.4  |      |
| 24 | 325.74 | 65.12 | 0.477818 | 624.77 | 1264.97 | 0     | 90 | 9.8   |      |
| 25 | 304.02 | 86.86 | 0.477794 | 624.77 | 1264.97 | 0     | 90 | 9.6   |      |
| 26 | 434.32 | 0     | 0.430006 | 843.43 | 822.23  | 1.52  | 90 | 6.8   |      |
| 27 | 412.6  | 21.72 | 0.430006 | 843.43 | 822.23  | 1.52  | 90 | 9     |      |
| 28 | 390.89 | 43.43 | 0.430006 | 843.43 | 822.23  | 1.52  | 90 | 10.5  |      |
| 29 | 325.74 | 65.12 | 0.477818 | 843.43 | 822.23  | 1.52  | 90 | 10.6  |      |
| 30 | 304.02 | 86.86 | 0.477794 | 843.43 | 822.23  | 1.52  | 90 | 10.75 |      |
| 31 | 450    | 0     | 0.4      | 670    | 1100    | 1.125 | 7  | 5.88  | [30] |
| 32 | 427.5  | 22.5  | 0.4      | 670    | 1100    | 2.25  | 7  | 7.83  |      |
| 33 | 405    | 45    | 0.4      | 670    | 1100    | 3.375 | 7  | 7.21  |      |
| 34 | 382.5  | 67.5  | 0.4      | 670    | 1100    | 4.5   | 7  | 6.62  |      |
| 35 | 360    | 90    | 0.4      | 670    | 1100    | 4.5   | 7  | 7.63  |      |
| 36 | 450    | 0     | 0.4      | 670    | 1100    | 1.125 | 28 | 7.68  |      |
| 37 | 427.5  | 22.5  | 0.4      | 670    | 1100    | 2.25  | 28 | 7.96  |      |
| 38 | 405    | 45    | 0.4      | 670    | 1100    | 3.375 | 28 | 7.91  |      |
| 39 | 382.5  | 67.5  | 0.4      | 670    | 1100    | 4.5   | 28 | 7.16  |      |
| 40 | 360    | 90    | 0.4      | 670    | 1100    | 4.5   | 28 | 7.7   |      |
| 41 | 450    | 0     | 0.4      | 670    | 1100    | 1.125 | 56 | 8.15  |      |
| 42 | 427.5  | 22.5  | 0.4      | 670    | 1100    | 2.25  | 56 | 8.18  |      |
| 43 | 405    | 45    | 0.4      | 670    | 1100    | 3.375 | 56 | 8.45  |      |
| 44 | 382.5  | 67.5  | 0.4      | 670    | 1100    | 4.5   | 56 | 8.9   |      |
| 45 | 360    | 90    | 0.4      | 670    | 1100    | 4.5   | 56 | 8.17  |      |
| 46 | 450    | 0     | 0.4      | 670    | 1100    | 1.125 | 90 | 8.2   |      |
| 47 | 427.5  | 22.5  | 0.4      | 670    | 1100    | 2.25  | 90 | 8.19  |      |
| 48 | 405    | 45    | 0.4      | 670    | 1100    | 3.375 | 90 | 8.6   |      |
| 49 | 382.5  | 67.5  | 0.4      | 670    | 1100    | 4.5   | 90 | 8.85  |      |

|    |        |       |          |        |         |      |    |      |      |
|----|--------|-------|----------|--------|---------|------|----|------|------|
| 50 | 360    | 90    | 0.4      | 670    | 1100    | 4.5  | 90 | 7.43 |      |
| 51 | 437.78 | 0     | 0.449998 | 643.68 | 1104.36 | 0    | 28 | 5.84 | [8]  |
| 52 | 415.89 | 21.89 | 0.449998 | 643.68 | 1104.36 | 0    | 28 | 6.12 |      |
| 53 | 394    | 43.78 | 0.449998 | 643.68 | 1104.36 | 0    | 28 | 6.32 |      |
| 54 | 372.11 | 65.67 | 0.449998 | 643.68 | 1104.36 | 0    | 28 | 6.73 |      |
| 55 | 350.22 | 87.56 | 0.449998 | 643.68 | 1104.36 | 0    | 28 | 6.45 |      |
| 56 | 510    | 0     | 0.317647 | 806    | 972     | 3    | 28 | 6.3  | [22] |
| 57 | 485    | 25    | 0.317647 | 806    | 972     | 3.25 | 28 | 6.6  |      |
| 58 | 460    | 50    | 0.317647 | 806    | 972     | 3.6  | 28 | 7    |      |
| 59 | 435    | 75    | 0.317647 | 806    | 972     | 3.8  | 28 | 7.2  |      |
| 60 | 410    | 100   | 0.317647 | 806    | 972     | 4    | 28 | 6.8  |      |
| 61 | 570    | 0     | 0.28     | 830.8  | 863.1   | 5.13 | 28 | 6.4  | [45] |
| 62 | 541.5  | 28.5  | 0.28     | 823.9  | 857.8   | 6.84 | 28 | 6.8  |      |
| 63 | 484.5  | 85.5  | 0.28     | 812.3  | 849.2   | 8.55 | 28 | 7.2  |      |

## References

1. Akin, O.O.; Ocholi, A.; Abejide, O.S.; Obari, J.A. Prediction of the Compressive Strength of Concrete Admixed with Metakaolin Using Gene Expression Programming. *Adv. Civ. Eng.* **2020**, *2020*, 8883412.
2. Qian, X.; Li, Z. The relationships between stress and strain for high-performance concrete with metakaolin. *Cem. Concr. Res.* **2001**, *31*, 1607–1611.
3. Dinakar, P.; Sahoo, P.K.; Sriram, G. Effect of metakaolin content on the properties of high strength concrete. *Int. J. Concr. Struct. Mater.* **2013**, *7*, 215–223.
4. Poon, C.-S.; Kou, S.; Lam, L. Compressive strength, chloride diffusivity and pore structure of high performance metakaolin and silica fume concrete. *Constr. Build. Mater.* **2006**, *20*, 858–865.
5. Madandoust, R.; Mousavi, S.Y. Fresh and hardened properties of self-compacting concrete containing metakaolin. *Constr. Build. Mater.* **2012**, *35*, 752–760.
6. Ramezani-pour, A.; Jovein, H.B. Influence of metakaolin as supplementary cementing material on strength and durability of concretes. *Constr. Build. Mater.* **2012**, *30*, 470–479.
7. Güneyisi, E.; Gesoğlu, M.; Mermerdaş, K. Improving strength, drying shrinkage, and pore structure of concrete using metakaolin. *Mater. Struct.* **2008**, *41*, 937–949.
8. John, N. Strength properties of metakaolin admixed concrete. *Int. J. Sci. Res. Publ.* **2013**, *3*, 1–7.
9. Khatib, J. Metakaolin concrete at a low water to binder ratio. *Constr. Build. Mater.* **2008**, *22*, 1691–1700.
10. Gill, A.S.; Siddique, R. Strength and micro-structural properties of self-compacting concrete containing metakaolin and rice husk ash. *Constr. Build. Mater.* **2017**, *157*, 51–64.
11. El-Din, H.K.S.; Eisa, A.S.; Aziz, B.H.A.; Ibrahim, A. Mechanical performance of high strength concrete made from high volume of Metakaolin and hybrid fibers. *Constr. Build. Mater.* **2017**, *140*, 203–209.
12. Rashad, A.M. A preliminary study on the effect of fine aggregate replacement with metakaolin on strength and abrasion resistance of concrete. *Constr. Build. Mater.* **2013**, *44*, 487–495.
13. Siddique, R.; Kadri, E.-H. Effect of metakaolin and foundry sand on the near surface characteristics of concrete. *Constr. Build. Mater.* **2011**, *25*, 3257–3266.
14. Wang, G.; Kong, Y.; Shui, Z.; Li, Q.; Han, J. Experimental investigation on chloride diffusion and binding in concrete containing metakaolin. *Corros. Eng. Sci. Technol.* **2014**, *49*, 282–286.
15. Dinakar, P.; Manu, S. Concrete mix design for high strength self-compacting concrete using metakaolin. *Mater. Des.* **2014**, *60*, 661–668.
16. Kavitha, O.; Shanthi, V.; Arulraj, G.P.; Sivakumar, P. Fresh, micro-and macrolevel studies of metakaolin blended self-compacting concrete. *Appl. Clay Sci.* **2015**, *114*, 370–374.
17. Muduli, R.; Mukharjee, B.B. Effect of incorporation of metakaolin and recycled coarse aggregate on properties of concrete. *J. Clean. Prod.* **2019**, *209*, 398–414.

18. Joshaghani, A.; Moeini, M.A.; Balapour, M. Evaluation of incorporating metakaolin to evaluate durability and mechanical properties of concrete. *Adv. Concr. Constr.* **2017**, *5*, 241.
19. Lenka, S.; Panda, K. Effect of metakaolin on the properties of conventional and self compacting concrete. *Adv. Concr. Constr.* **2017**, *5*, 031.
20. Badogiannis, E.; Tsivilis, S.; Papadakis, V.; Chaniotakis, E. The effect of metakaolin on concrete properties. In Proceedings of the International Congress on Challenges of Concrete Construction in Innovation and Development in Concrete Materials and Construction, Scotland, UK, 9–11 September 2002; pp. 81–89.
21. Saand, A.; Keerio, M.A.; Bangwar, D.K. Effect of soorh metakaolin on concrete compressive strength and durability. *Eng. Technol. Appl. Sci. Res.* **2017**, *7*, 2210–2214.
22. Narmatha, M.; Felixkala, T. Analyse the mechanical properties of metakaolin using as a partial replacement of cement in concrete. *Int. J. Adv. Res. Ideas Innov. Technol.* **2017**, *3*, 25–30.
23. Badogiannis, E.; Tsivilis, S. Exploitation of poor Greek kaolins: Durability of metakaolin concrete. *Cem. Concr. Compos.* **2009**, *31*, 128–133.
24. Bonakdar, A.; Bakhshi, M.; Ghalibafian, M. Properties of High-performance Concrete Containing High Reactivity Metakaolin. In Proceedings of 7th International Symposium on Utilization of High-Strength/High-Performance Concrete, Washington, DC, USA, 1 June–1 July 2005; pp. 228–295.
25. Güneyisi, E.; Gesoğlu, M.; Karaoglu, S.; Mermerdaş, K. Strength, permeability and shrinkage cracking of silica fume and metakaolin concretes. *Constr. Build. Mater.* **2012**, *34*, 120–130.
26. Kannan, V. Strength and durability performance of self compacting concrete containing self-combusted rice husk ash and metakaolin. *Constr. Build. Mater.* **2018**, *160*, 169–179.
27. Poon, C.; Kou, S.; Lam, L. Pore size distribution of high performance metakaolin concrete. *J. Wuhan Univ. Technol. - Mater. Sci. Ed.* **2002**, *17*, 42–46.
28. Meddah, M.S.; Ismail, M.A.; El-Gamal, S.; Fitriani, H. Performances evaluation of binary concrete designed with silica fume and metakaolin. *Constr. Build. Mater.* **2018**, *166*, 400–412.
29. Ferreira, R.; Castro-Gomes, J.; Costa, P.; Malheiro, R. Effect of metakaolin on the chloride ingress properties of concrete. *KSCE J. Civ. Eng.* **2016**, *20*, 1375–1384.
30. Shafiq, N.; Nuruddin, M.F.; Khan, S.U.; Ayub, T. Calcined kaolin as cement replacing material and its use in high strength concrete. *Constr. Build. Mater.* **2015**, *81*, 313–323.
31. Dubey, S.; Chandak, R.; Yadav, R. Experimental study of concrete with metakaolin as partial replacement of OPC. *Int J Adv. Eng Res Sci* **2015**, *2*, 38–40.
32. Kannan, V.; Ganesan, K. Chloride and chemical resistance of self compacting concrete containing rice husk ash and metakaolin. *Constr. Build. Mater.* **2014**, *51*, 225–234.
33. Akcay, B.; Tasdemir, M.A. Performance evaluation of silica fume and metakaolin with identical finenesses in self compacting and fiber reinforced concretes. *Constr. Build. Mater.* **2018**, *185*, 436–444.
34. Bumanis, G.; Bajare, D.; Korjakins, A. Durability of high strength self compacting concrete with metakaolin containing waste. In *Key Engineering Materials*; Trans Tech Publications Ltd: Zurich, Switzerland, 2016; pp. 65–70.
35. Ofuyatan, O.M.; Olowofoyeku, A.M.; Edeki, S.; Oluwafemi, J.; Ajao, A.; David, O. Incorporation of silica fume and metakaolin on self compacting concrete. *J. Phys. Conf. Ser.* **2019**, *1378*, 042089.
36. Ženíšek, M.; Vlach, T.; Laiblová, L. Dosage of Metakaolin in high performance concrete. In *Key Engineering Materials*; Trans Tech Publications Ltd: Zurich, Switzerland, 2017; pp. 311–315.
37. Abouhussien, A.A.; Hassan, A.A. Application of statistical analysis for mixture design of high-strength self-consolidating concrete containing metakaolin. *J. Mater. Civ. Eng.* **2014**, *26*, 04014016.
38. Sharbatdar, M.K.; Abbasi, M.; Fakharian, P. Improving the properties of self-compacted concrete with using combined silica fume and metakaolin. *Period. Polytech. Civ. Eng.* **2020**, *64*, 535–544.
39. Güneyisi, E.; Gesoğlu, M. Properties of self-compacting mortars with binary and ternary cementitious blends of fly ash and metakaolin. *Mater. Struct.* **2008**, *41*, 1519–1531.
40. Kesavraman, S. Studies on Metakaolin based banana fibre reinforced concrete. *Int. J. Civ. Eng. Technol.* **2017**, *8*, 532–543.
41. Al-Oran, A.A.A.; Safiee, N.A.; Nasir, N.A.M. Fresh and hardened properties of self-compacting concrete using metakaolin and GGBS as cement replacement. *Eur. J. Environ. Civ. Eng.* **2019**, *26*, 379–392.
42. Salimi, J.; Ramezani-pour, A.M.; Moradi, M.J. Studying the effect of low reactivity metakaolin on free and restrained shrinkage of high performance concrete. *J. Build. Eng.* **2020**, *28*, 101053.
43. Zoe, Y.; Hanif, I.; Adzmier, H.; Eyzati, H.; Syuhaili, M.N. Strength of Self-Compacting Concrete Containing Metakaolin and Nylon Fiber. *IOP Conf. Ser. : Earth Environ. Sci.* **2020**, *498*, 012047.
44. Kannan, V.; Ganesan, K. Evaluation of mechanical and permeability related properties of self compacting concrete containing metakaolin. *Sci. Res. Essays* **2012**, *7*, 4081–4091.

45. Güneyisi, E.; Gesoğlu, M.; Qays, M.A.; Mermerdaş, K.; İpek, S. Fracture properties of high strength metakaolin and silica fume concretes. In Proceedings of the 3rd International Conference on Chemical, Civil and Environmental Engineering (CCEE-2016), Antalya, Turkey, 20–21 April 2016.
